# Supplementary material for: From deep blue to green emitting and ultralong fluorescent copper(i) halide complexes containing dimethylthiophene diphosphine and PPh3ligands
Source: Royal Society of Chemistry journal article supplement (doi:10.1039/c9dt01548e), 2019-01-01
Supplement: c9dt01548e1.pdf [file c9dt01548e1.pdf]

Electronic Supplementary Information for  
**From Deep Blue to Green Emitting and Ultralong Fluorescent  
Copper(I) Halide Complexes Containing Dimethylthiophene  
Diphosphine and PPh<sub>3</sub> Ligands**

Qiong Wei, Rui Zhang, Li Liu\*, Xin-Xin Zhong\*, Lei Wang\*, Guang Hua Li, Fa-Bao  
Li, Khalid A. Alamry, Yi Zhao

**Contents**

**Experimental Details**

1. NMR Experiments

**Fig. S1** <sup>1</sup>H NMR spectrum of **dpmt** in *d*<sub>6</sub>-DMSO.

**Fig. S2** <sup>13</sup>C NMR spectrum of **dpmt** in CDCl<sub>3</sub>.

**Fig. S3** <sup>31</sup>P NMR spectrum of **dpmt** in CDCl<sub>3</sub>.

**Fig. S4** <sup>1</sup>H NMR spectrum of **1** in CDCl<sub>3</sub>.

**Fig. S5** <sup>1</sup>H NMR spectrum of **2** in CDCl<sub>3</sub>.

**Fig. S6** <sup>1</sup>H NMR spectrum of **3** in CDCl<sub>3</sub>.

**Fig. S7** <sup>13</sup>C NMR spectrum of **1** in CDCl<sub>3</sub>.

**Fig. S8** <sup>13</sup>C NMR spectrum of **2** in CDCl<sub>3</sub>.

**Fig. S9** <sup>13</sup>C NMR spectrum of **3** in CDCl<sub>3</sub>.

**Fig. S10** <sup>31</sup>P NMR spectrum of **1** in CDCl<sub>3</sub>.

**Fig. S11** <sup>31</sup>P NMR spectrum of **2** in CDCl<sub>3</sub>.

**Fig. S12** <sup>31</sup>P NMR spectrum of **3** in CDCl<sub>3</sub>.

2. Molecular structures

**Fig. S13.** 1-D molecular structure and C–H···π interactions in **1**.

**Fig. S14.** 1-D molecular structure and C–H···π interactions in **2**.

**Fig. S15.** 1-D molecular structure and C–H···π interactions in **3**.

3. Photophysical properties

**Fig. S16.** PL spectra of **1-3** in pristine and in 10% PMMA films.

**Fig. S17.** Excitation spectra of **1-3** in crystal state.

**Fig. S18.** Time profiles of luminescence decay and exponential fit spectrum of **1** at r.t.

**Fig. S19.** Time profiles of luminescence decay and exponential fit spectrum of **2** at r.t.

**Fig. S20.** Time profiles of luminescence decay and exponential fit spectrum of **3** at r.t.

**Fig. S21.** Time profiles of luminescence decay and exponential fit spectrum of **1** at 77 K.

**Fig. S22.** Time profiles of luminescence decay and exponential fit spectrum of **2** at 77 K.

**Fig. S23.** Time profiles of luminescence decay and exponential fit spectrum of **3** at 77 K.

#### 4. Computational details

**Fig. S24.** The absorption spectrum of complex **1** in CH<sub>2</sub>Cl<sub>2</sub>.

**Fig. S25.** The absorption spectrum of complex **2** in CH<sub>2</sub>Cl<sub>2</sub>.

**Fig. S26.** The absorption spectrum of complex **3** in CH<sub>2</sub>Cl<sub>2</sub>.

**Fig. S27.** Contour plots of frontier molecular orbitals of complexes **1-3** in CH<sub>2</sub>Cl<sub>2</sub>.

**Fig. S28.** The core structures in the optimized S<sub>0</sub>, S<sub>1</sub>, and T<sub>1</sub> geometries for complexes **1-3**.

**Fig. S29.** The device performance of doped device when CBP served as host material.

**Fig. S30.** The device performance of doped device when mCP served as host material.

**Fig. S31.** AFM images of undoped film and doped film.

**Table S1.** Selected bond lengths (Å) and angles (°) in the optimized S<sub>0</sub>, S<sub>1</sub>, and T<sub>1</sub> geometries for complexes **1-3**.

**Table S2.** Energy and compositions of frontiers molecular orbitals of complex **1** in CH<sub>2</sub>Cl<sub>2</sub>.

**Table S3.** Energy and compositions of frontiers molecular orbitals of complex **2** in CH<sub>2</sub>Cl<sub>2</sub>.

**Table S4.** Energy and compositions of frontiers molecular orbitals of complex **3** in CH<sub>2</sub>Cl<sub>2</sub>.

**Table S5.** Computed excitation states for complex **1** in CH<sub>2</sub>Cl<sub>2</sub>.

**Table S6.** Computed excitation states for complex **2** in CH<sub>2</sub>Cl<sub>2</sub>.

**Table S7.** Computed excitation states for complex **3** in CH<sub>2</sub>Cl<sub>2</sub>.

## Experimental Details

### 1. NMR Experiments

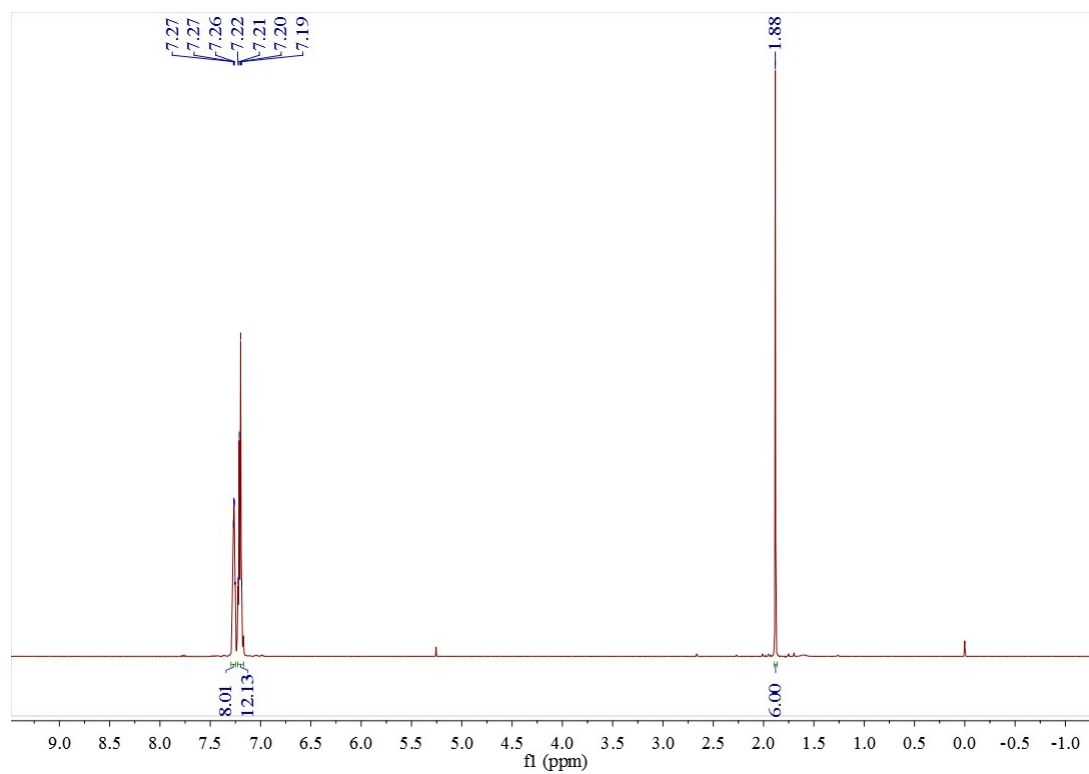

**Fig. S1** <sup>1</sup>H NMR spectrum of dpmt in CDCl<sub>3</sub>.

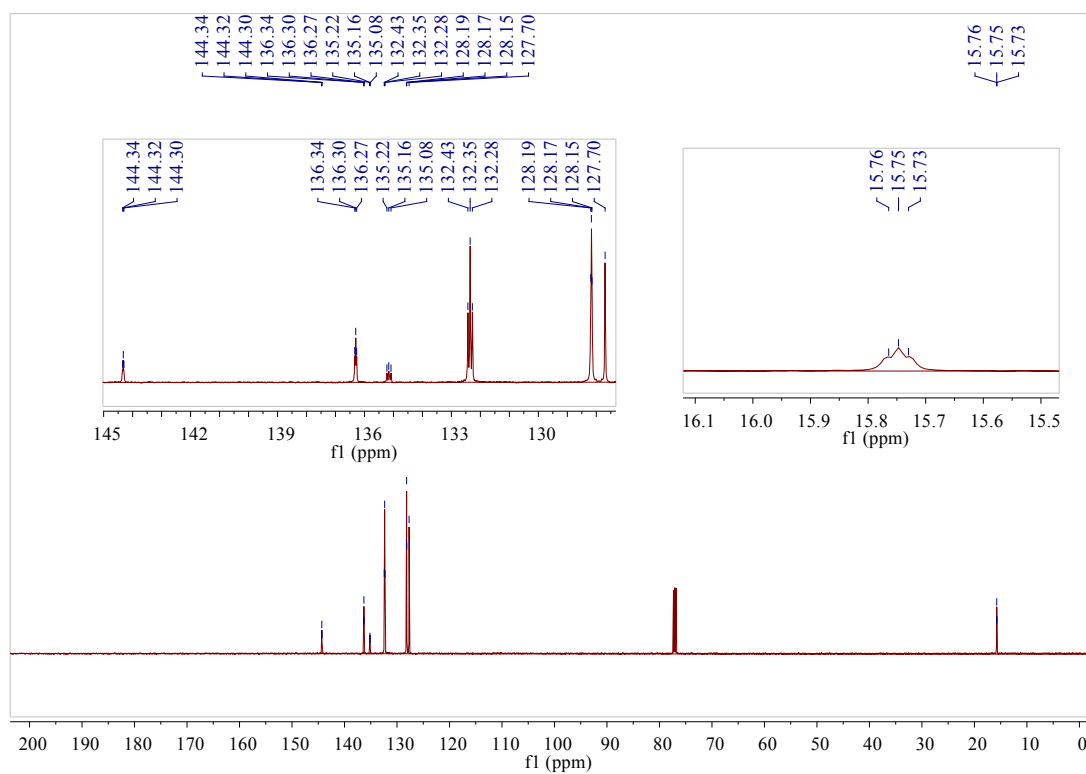

**Fig. S2**  $^{13}\text{C}$  NMR spectrum of **dpmt** in  $\text{CDCl}_3$ .

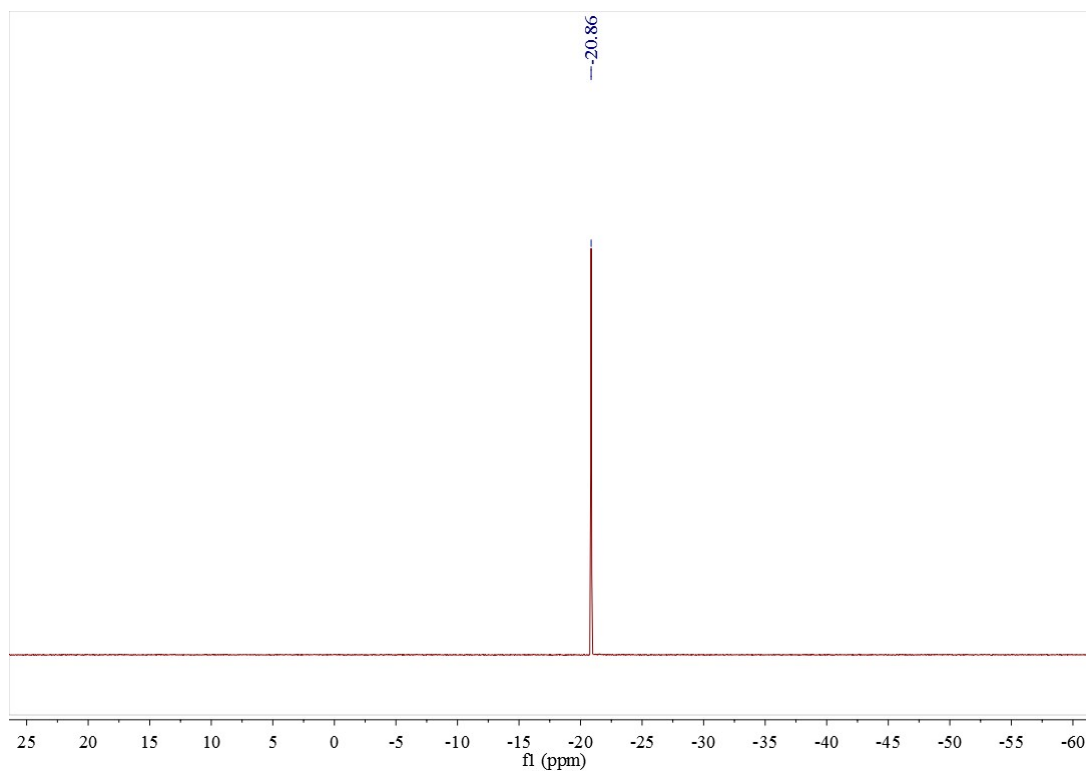

**Fig. S3**  $^{31}\text{P}$  NMR spectrum of **dpmt** in  $\text{CDCl}_3$ .

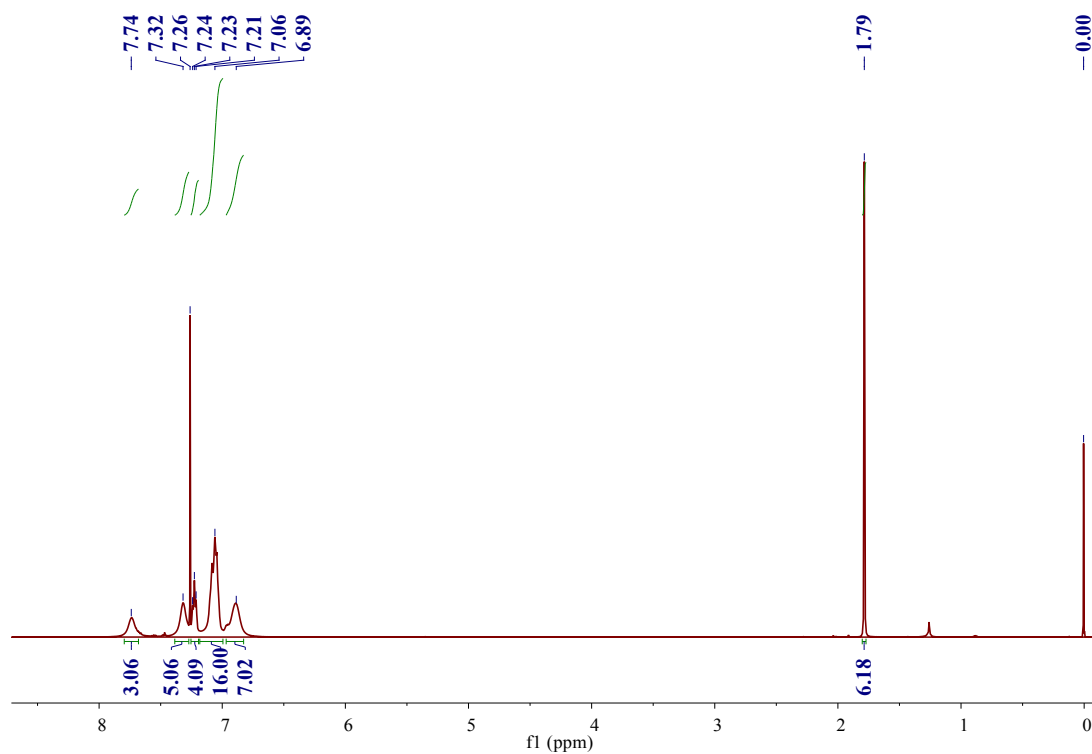

Fig. S4.  $^1\text{H}$  NMR spectrum of **1** in  $\text{CDCl}_3$ .

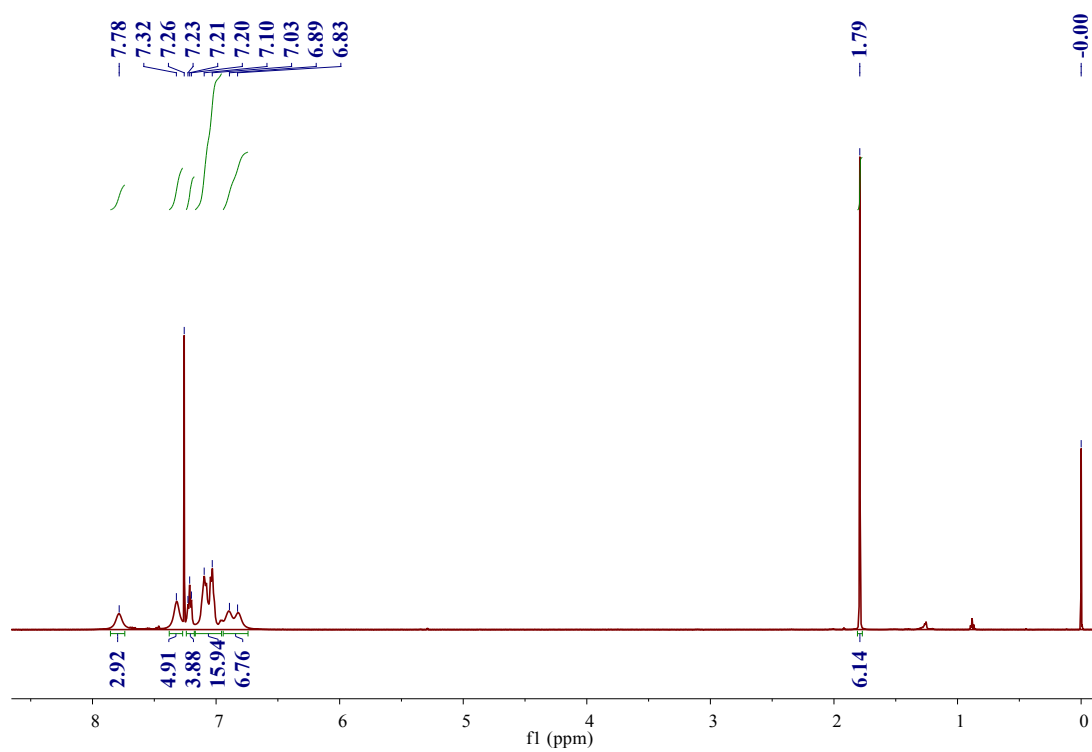

Fig. S5.  $^1\text{H}$  NMR spectrum of **2** in  $\text{CDCl}_3$ .

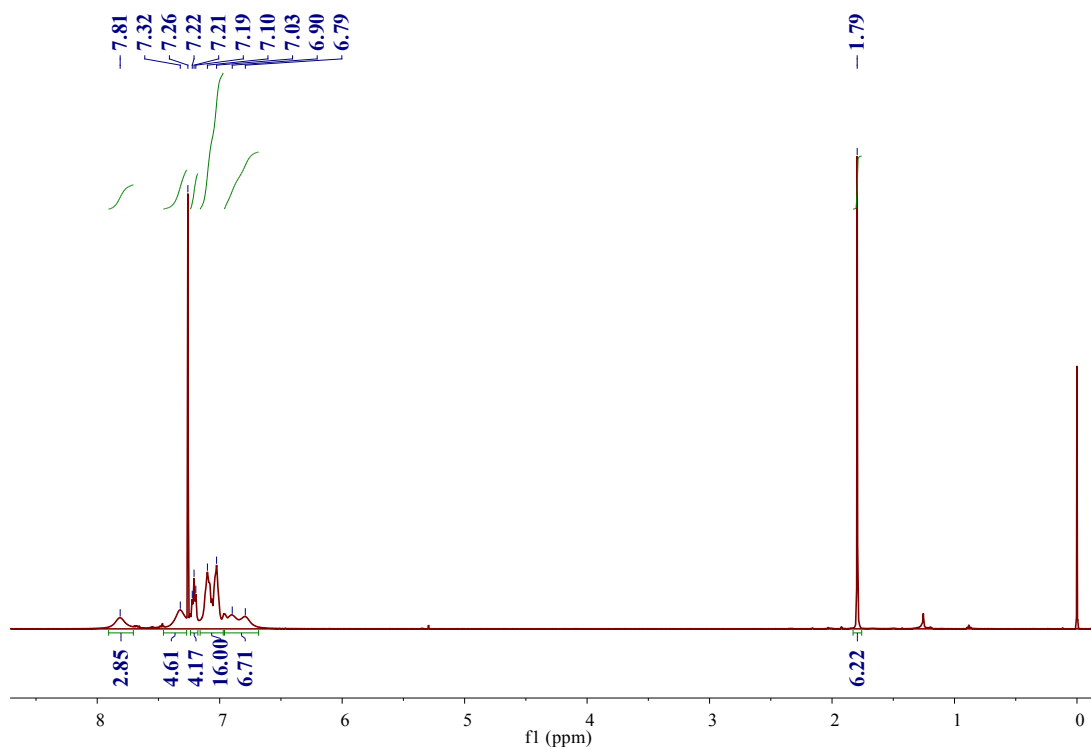

Fig. S6. <sup>1</sup>H NMR spectrum of **3** in CDCl<sub>3</sub>.

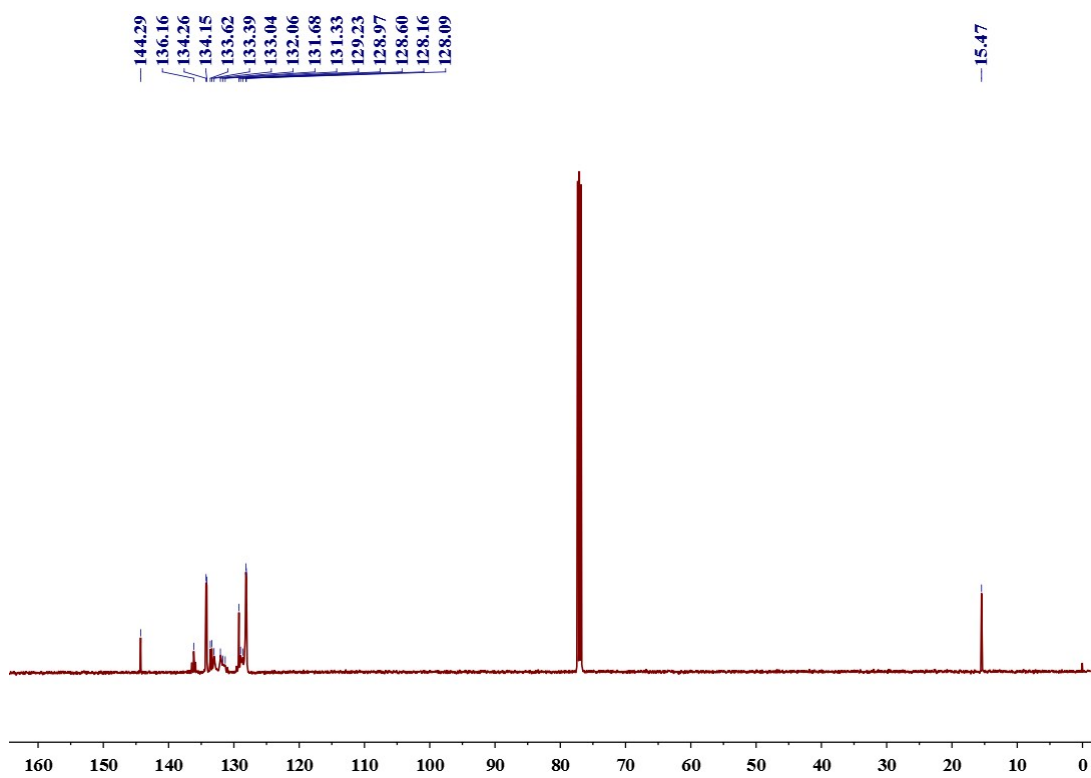

Fig. S7. <sup>13</sup>C NMR spectrum of **1** in CDCl<sub>3</sub>.

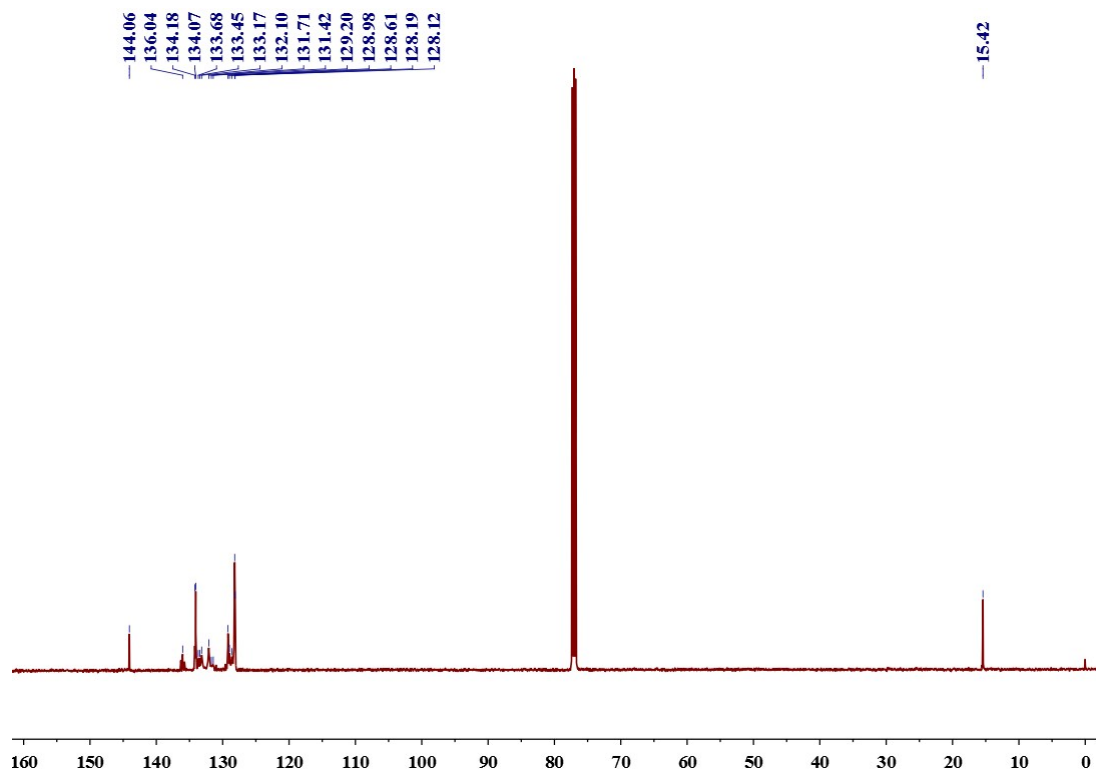

Fig. S8. <sup>13</sup>C NMR spectrum of **2** in CDCl<sub>3</sub>.

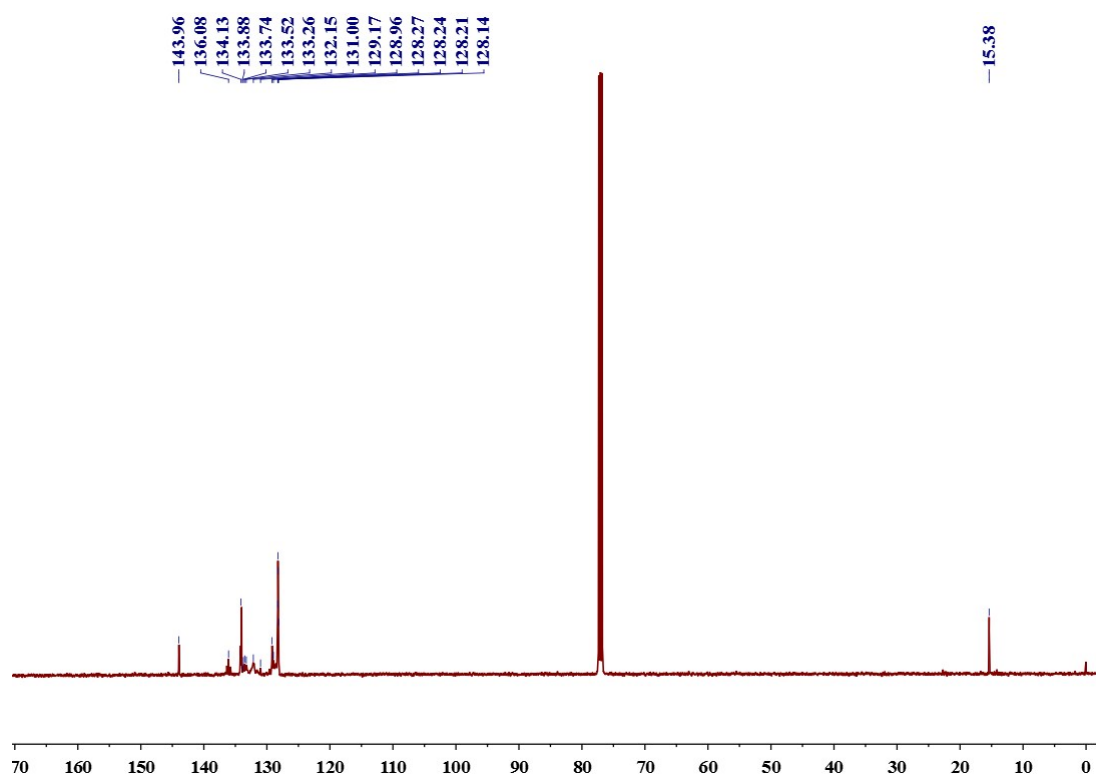

Fig. S9. <sup>13</sup>C NMR spectrum of **3** in CDCl<sub>3</sub>.

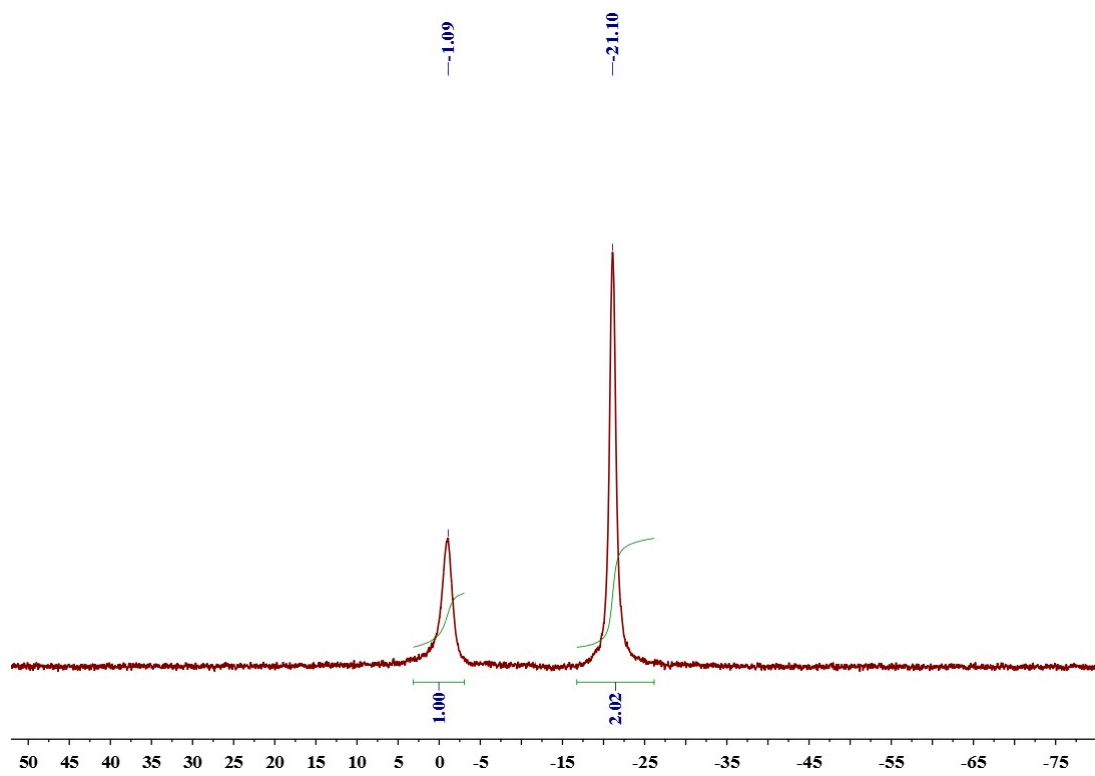

Fig. S10.  $^{31}\text{P}$  NMR spectrum of **1** in  $\text{CDCl}_3$ .

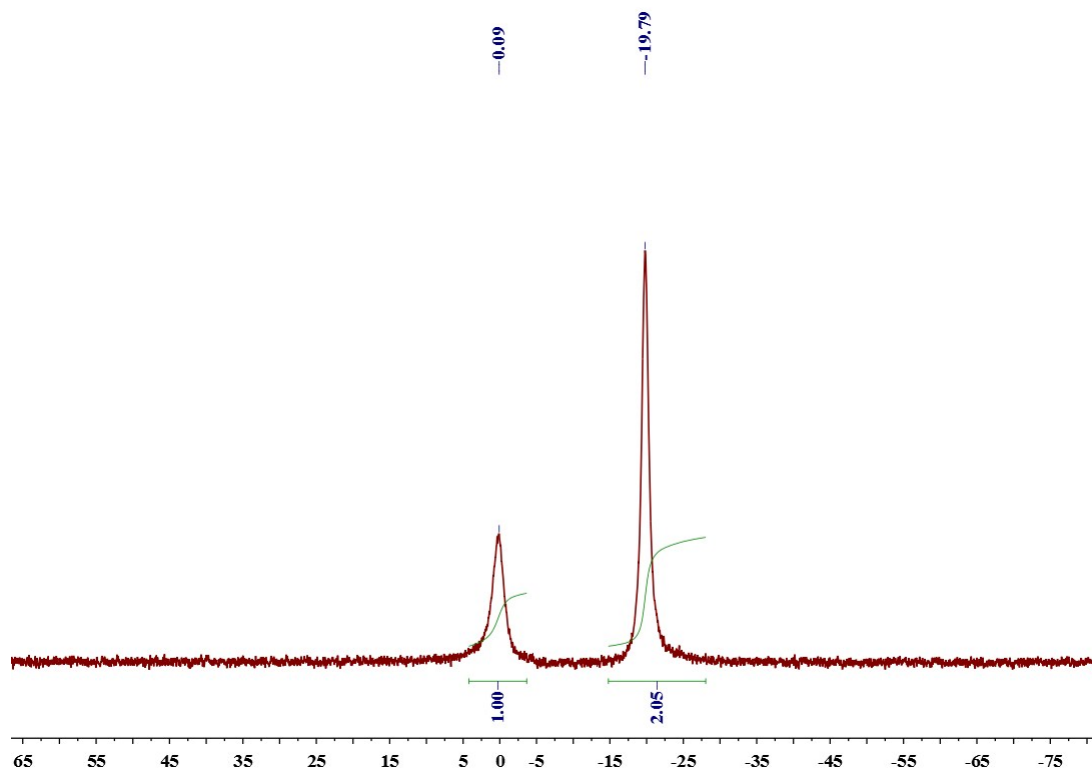

Fig. S11.  $^{31}\text{P}$  NMR spectrum of **2** in  $\text{CDCl}_3$ .



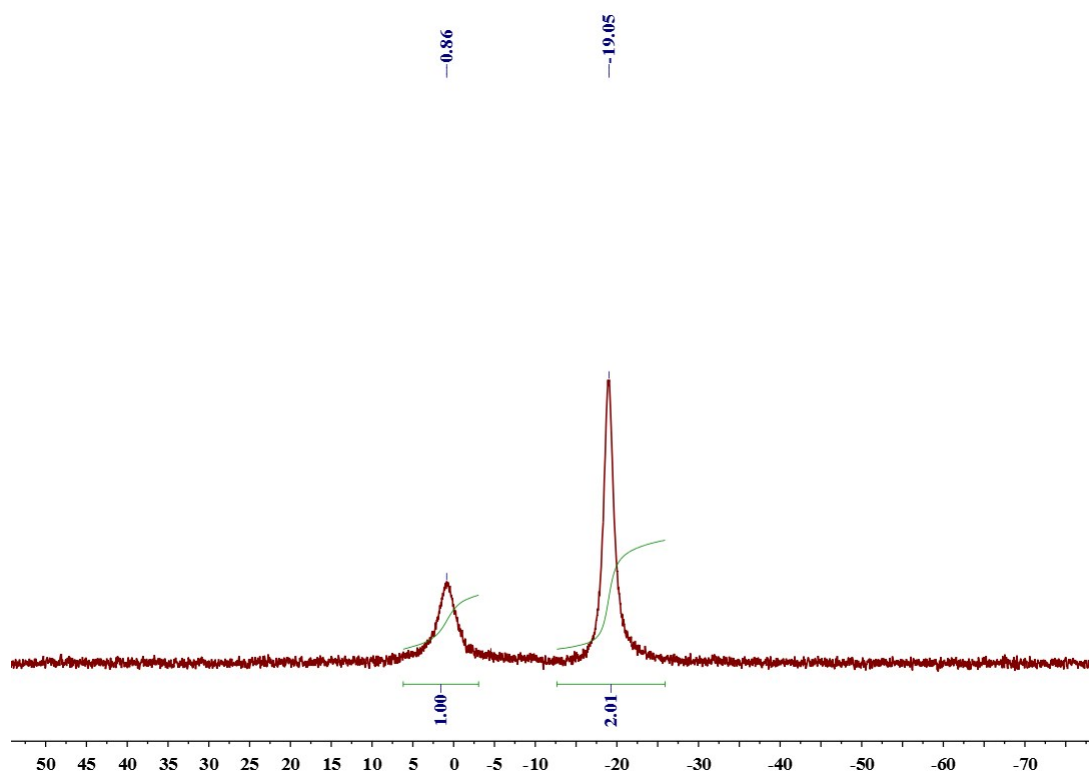

**Fig. S12.**  $^{31}\text{P}$  NMR spectrum of **3** in  $\text{CDCl}_3$ .

## 2. Molecular structures

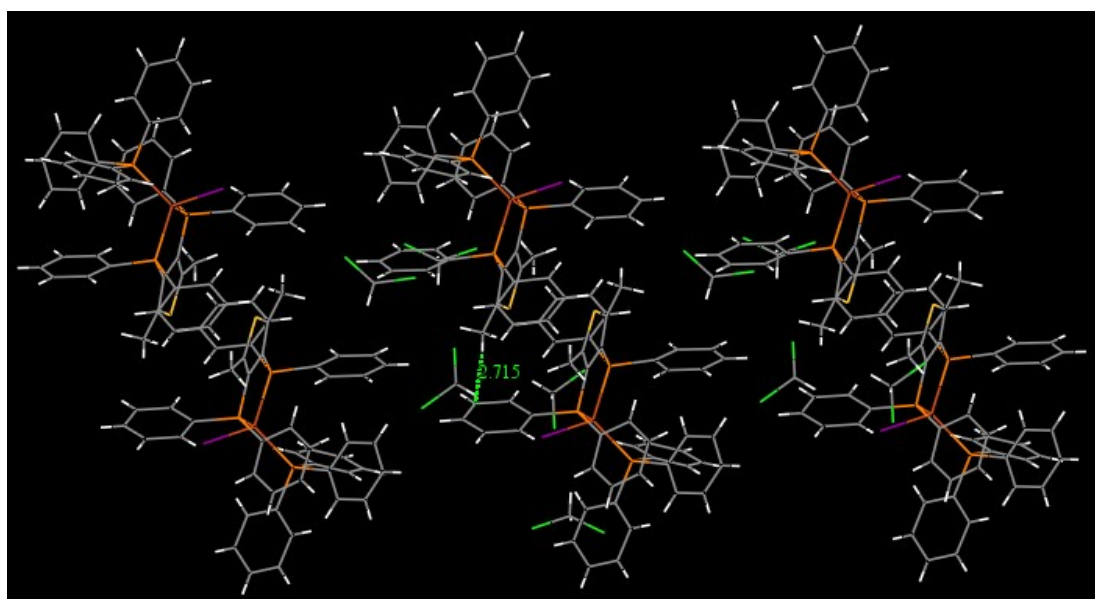

**Fig. S13.** 1-D molecular structure and C-H... $\pi$  interactions in **1**.

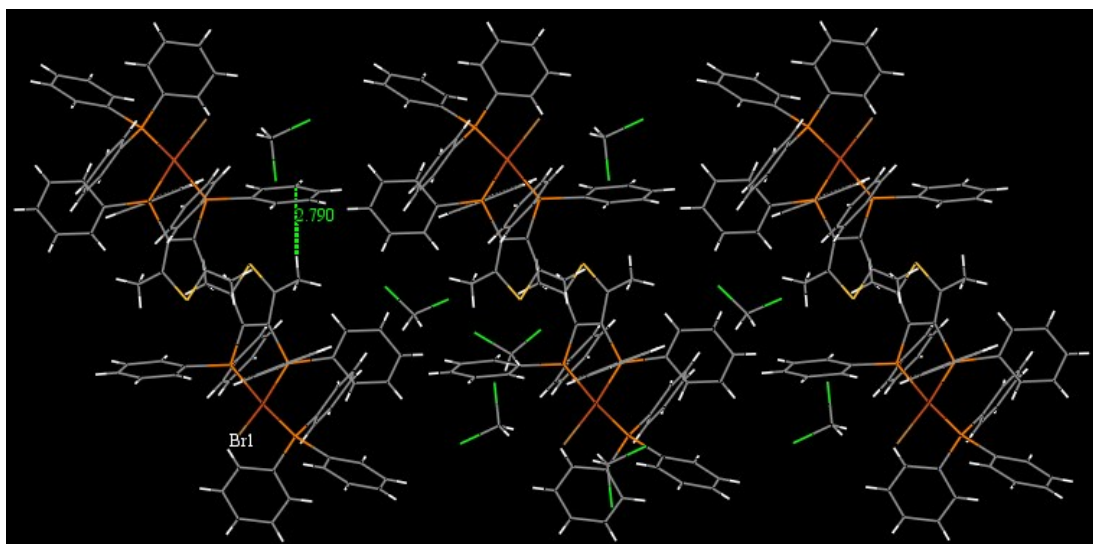

**Fig. S14.** 1-D molecular structure and C-H... $\pi$  interactions in **2**.

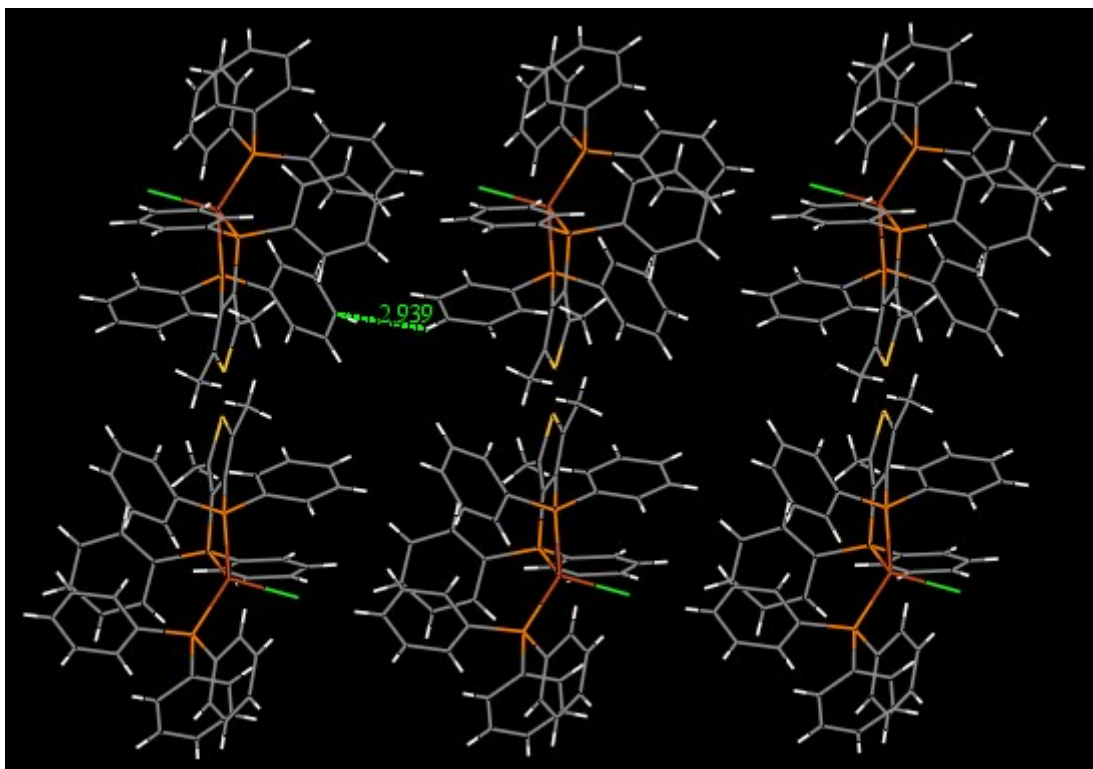

**Fig. S15.** 1-D molecular structure and C-H... $\pi$  interactions in **3**.

### 3. Photophysical properties

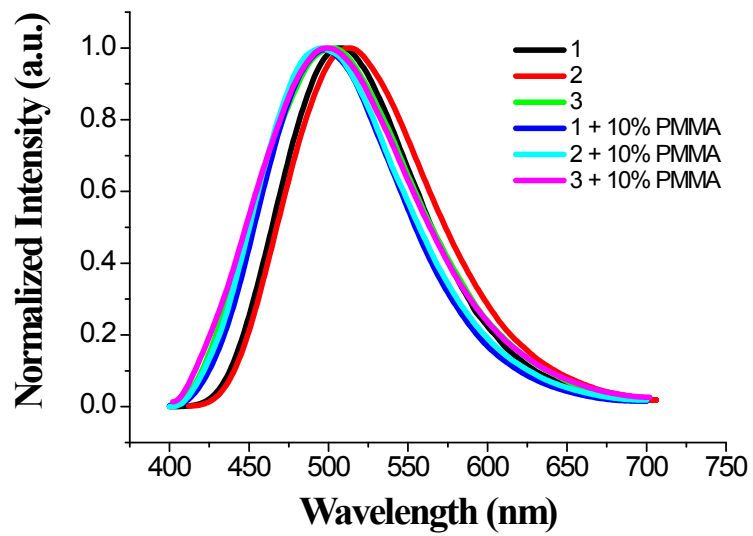

Fig. S16. PL spectra of 1-3 in pristine and in 10% PMMA films.

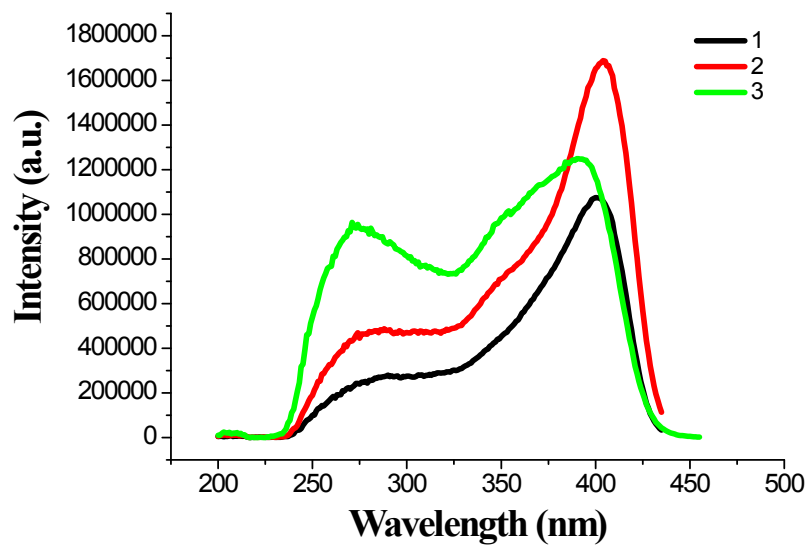

Fig. S17. Excitation spectra of 1-3 in crystal state.

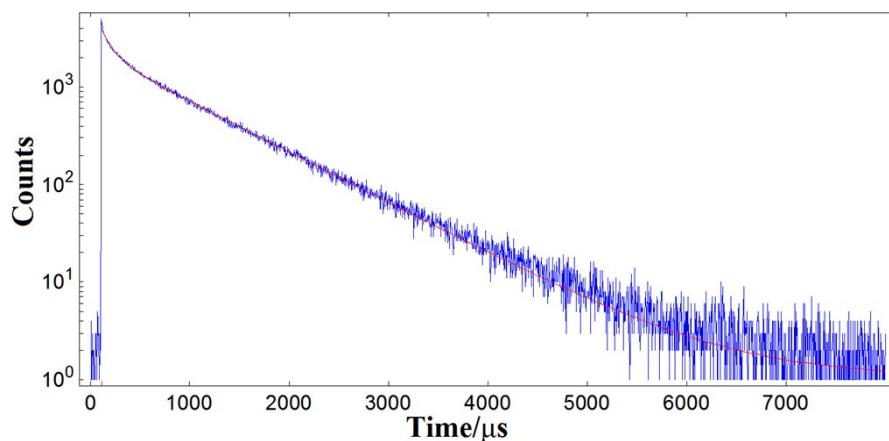

|                  | Fix                      | Value / $\mu\text{s}$ | Std. Dev / $\mu\text{s}$ | Fix   | Value                    | Std. Dev | Rel %   |
|------------------|--------------------------|-----------------------|--------------------------|-------|--------------------------|----------|---------|
| $\tau_1$         | <input type="checkbox"/> | 108.3728              | 1.96519                  | $B_1$ | <input type="checkbox"/> | 1944.482 | 23.0396 |
| $\tau_2$         | <input type="checkbox"/> | 829.7635              | 1.94095                  | $B_2$ | <input type="checkbox"/> | 2101.846 | 8.5649  |
| $\tau_3$         | <input type="checkbox"/> |                       |                          | $B_3$ | <input type="checkbox"/> |          |         |
| $\tau_4$         | <input type="checkbox"/> |                       |                          | $B_4$ | <input type="checkbox"/> |          |         |
|                  |                          |                       |                          | A     | <input type="checkbox"/> | 1.070    |         |
| $\chi^2 : 1.195$ |                          |                       |                          |       |                          |          |         |

(in crystal state)

|                  | Fix                      | Value / $\mu\text{s}$ | Std. Dev / $\mu\text{s}$ | Fix   | Value                    | Std. Dev | Rel %  |
|------------------|--------------------------|-----------------------|--------------------------|-------|--------------------------|----------|--------|
| $\tau_1$         | <input type="checkbox"/> | 1.2854                | 0.06805                  | $B_1$ | <input type="checkbox"/> | 0.896    | 0.0282 |
| $\tau_2$         | <input type="checkbox"/> | 20.7018               | 0.17214                  | $B_2$ | <input type="checkbox"/> | 0.880    | 0.0092 |
| $\tau_3$         | <input type="checkbox"/> | 620.2981              | 3.47783                  | $B_3$ | <input type="checkbox"/> | 0.041    | 0.0003 |
| $\tau_4$         | <input type="checkbox"/> |                       |                          | $B_4$ | <input type="checkbox"/> |          |        |
| $\delta t$       | <input type="checkbox"/> | 0.0002                | 0.0004                   | A     | <input type="checkbox"/> | -0.014   |        |
| $\chi^2 : 1.103$ |                          |                       |                          |       |                          |          |        |

(in powder state)

**Fig. S18.** Time profiles of luminescence decay and exponential fit spectrum of **1** at r.t.

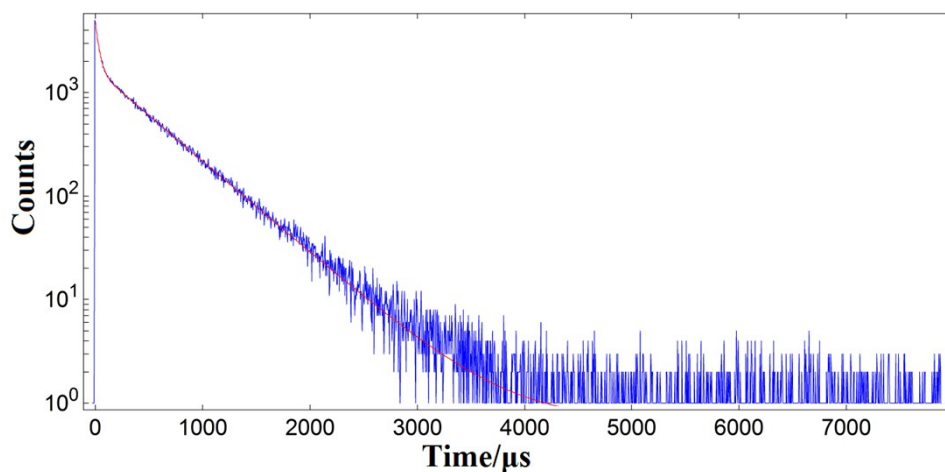

|                                    | Fix                      | Value / $\mu\text{s}$ | Std. Dev / $\mu\text{s}$ | Fix                  | Value                    | Std. Dev | Rel %   |
|------------------------------------|--------------------------|-----------------------|--------------------------|----------------------|--------------------------|----------|---------|
| $\tau_1$                           | <input type="checkbox"/> | 33.7363               | 0.54892                  | <b>B<sub>1</sub></b> | <input type="checkbox"/> | 3607.876 | 48.0266 |
| $\tau_2$                           | <input type="checkbox"/> | 490.8053              | 1.33990                  | <b>B<sub>2</sub></b> | <input type="checkbox"/> | 1681.683 | 7.2950  |
| $\tau_3$                           | <input type="checkbox"/> |                       |                          | <b>B<sub>3</sub></b> | <input type="checkbox"/> |          |         |
| $\tau_4$                           | <input type="checkbox"/> |                       |                          | <b>B<sub>4</sub></b> | <input type="checkbox"/> |          |         |
|                                    |                          |                       |                          | <b>A</b>             | <input type="checkbox"/> | 0.675    |         |
| <b><math>\chi^2 : 0.852</math></b> |                          |                       |                          |                      |                          |          |         |

(in crystal state)

|              | Value    | Std. Dev. |                      | Value    | Std. Dev. | Rel. % |
|--------------|----------|-----------|----------------------|----------|-----------|--------|
| $\tau_1$ (s) | 3.280E-5 | 3.303E-7  | <b>B<sub>1</sub></b> | 1.846E+3 | 1.464E+1  | 30.66  |
| $\tau_2$ (s) | 2.864E-4 | 1.252E-6  | <b>B<sub>2</sub></b> | 4.781E+2 | 3.441E+0  | 69.34  |
| $\tau_3$ (s) | --       | --        | <b>B<sub>3</sub></b> | --       | --        | --     |
| $\tau_4$ (s) | --       | --        | <b>B<sub>4</sub></b> | --       | --        | --     |
| $\chi^2$     | 1.175E+0 |           | <b>A</b>             | 8.130E-1 |           |        |

(in powder state)

**Fig. S19.** Time profiles of luminescence decay and exponential fit spectrum of **2** at r.t.

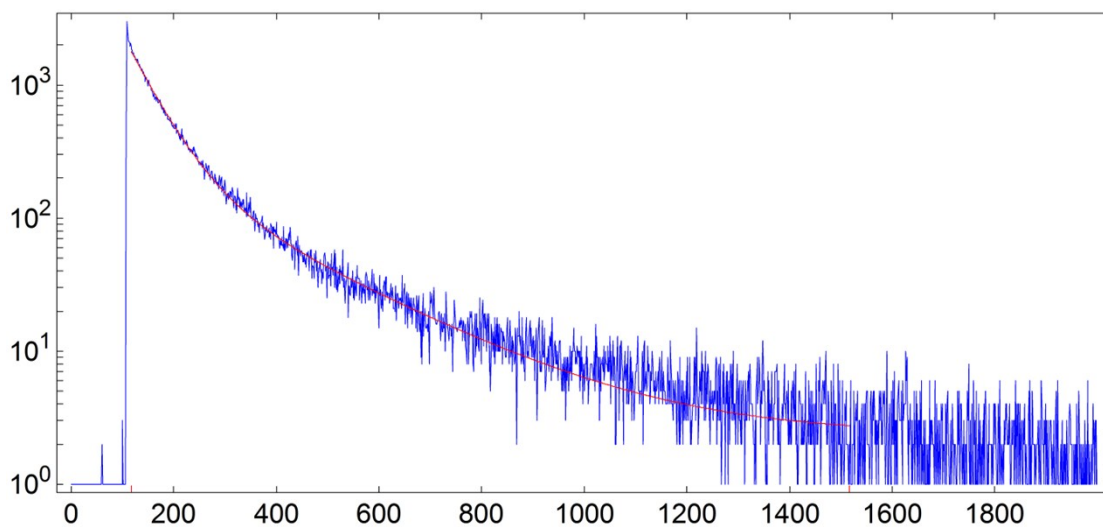

$$\text{Fit} = A + B_1 \cdot \exp(-t/T_1) + B_2 \cdot \exp(-t/T_2)$$

|    | Value    | Std Dev  | Value | Std Dev  | Rel %    |       |
|----|----------|----------|-------|----------|----------|-------|
| T1 | 5.471E-5 | 5.562E-7 | B1    | 1.593E+3 | 1.022E+1 | 63.89 |
| T2 | 2.188E-4 | 3.903E-6 | B2    | 2.252E+2 | 7.819E+0 | 36.11 |

Chisq 1.253E+0      A 2.383E+0

(in crystal state)

|                                    | Fix                      | Value / $\mu\text{s}$ | Std. Dev / $\mu\text{s}$ | Fix   | Value    | Std. Dev | Rel % |
|------------------------------------|--------------------------|-----------------------|--------------------------|-------|----------|----------|-------|
| $\tau_1$                           | <input type="checkbox"/> | 41.3663               | 0.33010                  | $B_1$ | 1649.567 | 8.5492   | 52.06 |
| $\tau_2$                           | <input type="checkbox"/> | 175.2454              | 1.24378                  | $B_2$ | 358.633  | 5.4763   | 47.94 |
| $\tau_3$                           | <input type="checkbox"/> |                       |                          | $B_3$ |          |          |       |
| $\tau_4$                           | <input type="checkbox"/> |                       |                          | $B_4$ |          |          |       |
|                                    |                          |                       |                          | A     | 1.653    |          |       |
| <b><math>\chi^2 : 1.310</math></b> |                          |                       |                          |       |          |          |       |

(in powder state)

**Fig. S20.** Time profiles of luminescence decay and exponential fit spectrum of **3** at r.t.

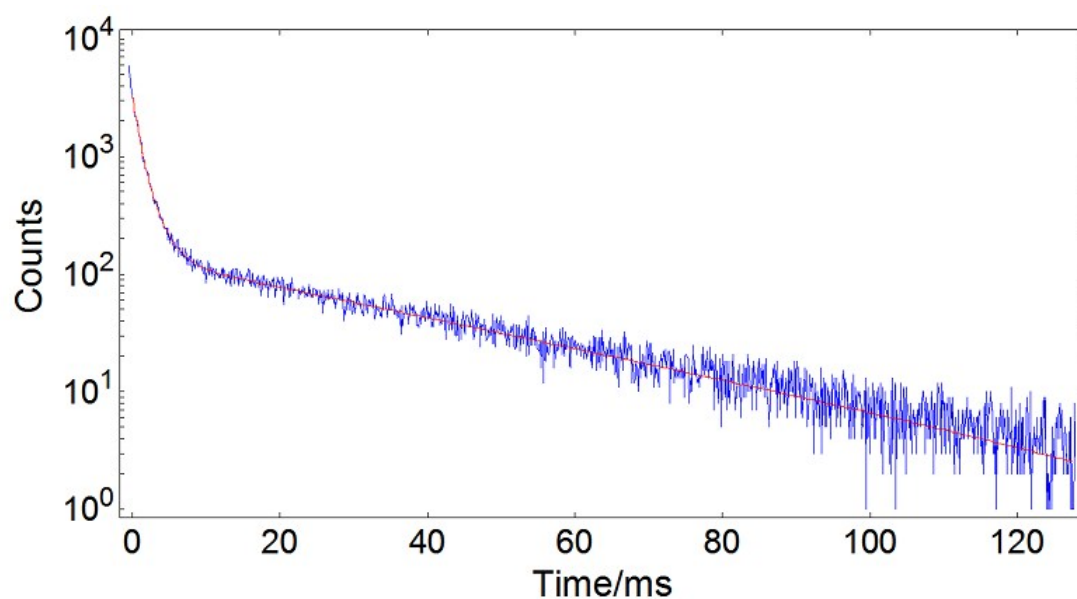

|                  | Fix                      | Value / ms | Std. Dev / ms | Fix   | Value    | Std. Dev | Rel % |
|------------------|--------------------------|------------|---------------|-------|----------|----------|-------|
| $\tau_1$         | <input type="checkbox"/> | 0.7806     | 0.06293       | $B_1$ | 2124.569 | 209.6010 | 18.48 |
| $\tau_2$         | <input type="checkbox"/> | 1.8595     | 0.11175       | $B_2$ | 1358.792 | 229.2201 | 28.16 |
| $\tau_3$         | <input type="checkbox"/> | 33.8564    | 0.52339       | $B_3$ | 141.437  | 1.7820   | 53.36 |
| $\tau_4$         | <input type="checkbox"/> |            |               | $B_4$ |          |          |       |
|                  |                          |            |               | A     | -0.720   |          |       |
| $\chi^2 : 1.187$ |                          |            |               |       |          |          |       |

(in crystal state)

|                  | Fix                      | Value / $\mu$ s | Std. Dev / $\mu$ s | Fix   | Value   | Std. Dev | Rel % |
|------------------|--------------------------|-----------------|--------------------|-------|---------|----------|-------|
| $\tau_1$         | <input type="checkbox"/> | 1134.7823       | 21.13242           | $B_1$ | 237.795 | 4.0882   | 36.49 |
| $\tau_2$         | <input type="checkbox"/> | 17818.8948      | 341.40864          | $B_2$ | 26.355  | 0.4888   | 63.51 |
| $\tau_3$         | <input type="checkbox"/> |                 |                    | $B_3$ |         |          |       |
| $\tau_4$         | <input type="checkbox"/> |                 |                    | $B_4$ |         |          |       |
|                  |                          |                 |                    | A     | 0.836   |          |       |
| $\chi^2 : 1.157$ |                          |                 |                    |       |         |          |       |

(in powder state)

**Fig. S21.** Time profiles of luminescence decay and exponential fit spectrum of **1** at 77 K.

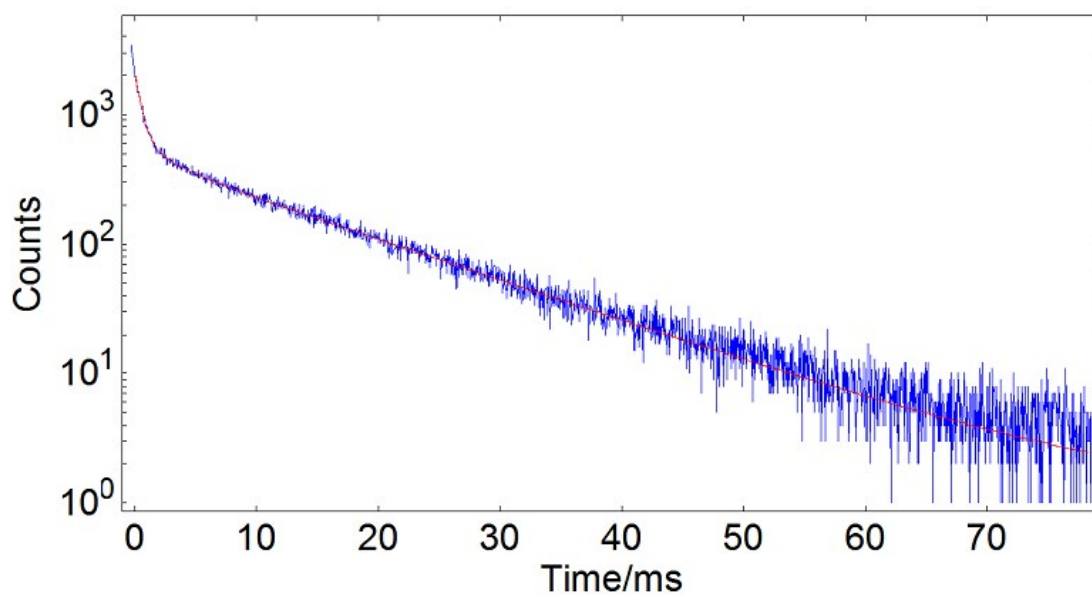

|                                    | Fix                      | Value / $\mu\text{s}$ | Std. Dev / $\mu\text{s}$ | Fix   | Value                    | Std. Dev | Rel %   |
|------------------------------------|--------------------------|-----------------------|--------------------------|-------|--------------------------|----------|---------|
| $\tau_1$                           | <input type="checkbox"/> | 569.9055              | 20.04261                 | $B_1$ | <input type="checkbox"/> | 1536.784 | 31.6114 |
| $\tau_2$                           | <input type="checkbox"/> | 2723.9621             | 498.89538                | $B_2$ | <input type="checkbox"/> | 150.036  | 28.3498 |
| $\tau_3$                           | <input type="checkbox"/> | 13662.3926            | 115.18675                | $B_3$ | <input type="checkbox"/> | 468.347  | 6.9051  |
| $\tau_4$                           | <input type="checkbox"/> |                       |                          | $B_4$ | <input type="checkbox"/> |          |         |
|                                    |                          |                       |                          | A     | <input type="checkbox"/> | 0.941    |         |
| <b><math>\chi^2</math> : 1.219</b> |                          |                       |                          |       |                          |          |         |

(in crystal state)

|                                    | Fix                      | Value / $\mu\text{s}$ | Std. Dev / $\mu\text{s}$ | Fix   | Value                    | Std. Dev | Rel %   |
|------------------------------------|--------------------------|-----------------------|--------------------------|-------|--------------------------|----------|---------|
| $\tau_1$                           | <input type="checkbox"/> | 1320.4668             | 24.72782                 | $B_1$ | <input type="checkbox"/> | 988.741  | 12.1391 |
| $\tau_2$                           | <input type="checkbox"/> | 11194.9288            | 24.49107                 | $B_2$ | <input type="checkbox"/> | 1246.700 | 4.4162  |
| $\tau_3$                           | <input type="checkbox"/> |                       |                          | $B_3$ | <input type="checkbox"/> |          |         |
| $\tau_4$                           | <input type="checkbox"/> |                       |                          | $B_4$ | <input type="checkbox"/> |          |         |
|                                    |                          |                       |                          | A     | <input type="checkbox"/> | 1.938    |         |
| <b><math>\chi^2</math> : 1.416</b> |                          |                       |                          |       |                          |          |         |

(in powder state)

**Fig. S22.** Time profiles of luminescence decay and exponential fit spectrum of **2** at 77 K.



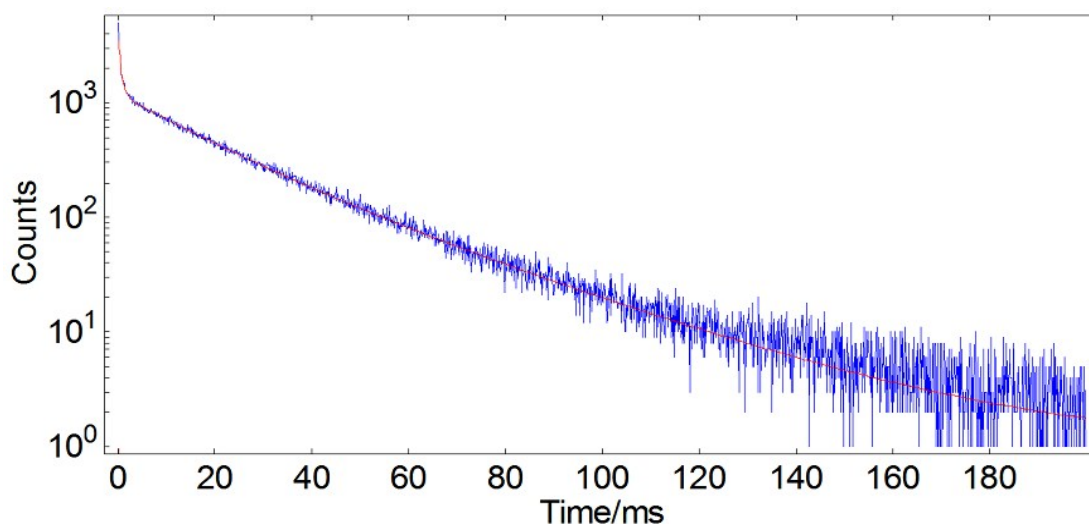

$$\text{Fit} = A + B_1 \cdot \exp(-t/T_1) + B_2 \cdot \exp(-t/T_2) + B_3 \cdot \exp(-t/T_3)$$

|       | Value    | Std Dev  | Value | Std Dev  | Rel %    |
|-------|----------|----------|-------|----------|----------|
| T1    | 5.969E-4 | 1.416E-5 | B1    | 2.639E+3 | 5.133E+1 |
| T2    | 1.576E-2 | 6.124E-4 | B2    | 7.684E+2 | 5.011E+1 |
| T3    | 3.120E-2 | 1.090E-3 | B3    | 4.321E+2 | 5.418E+1 |
| Chisq | 1.249E+0 |          | A     | 1.047E+0 |          |

(in crystal state)

|                  | Fix                      | Value / $\mu\text{s}$ | Std. Dev / $\mu\text{s}$ | Fix   | Value                            | Std. Dev | Rel % |
|------------------|--------------------------|-----------------------|--------------------------|-------|----------------------------------|----------|-------|
| $\tau_1$         | <input type="checkbox"/> | 7063.5519             | 247.90756                | $B_1$ | <input type="checkbox"/> 505.612 | 20.8216  | 26.95 |
| $\tau_2$         | <input type="checkbox"/> | 16396.4597            | 198.99222                | $B_2$ | <input type="checkbox"/> 590.452 | 22.6975  | 73.05 |
| $\tau_3$         | <input type="checkbox"/> |                       |                          | $B_3$ | <input type="checkbox"/>         |          |       |
| $\tau_4$         | <input type="checkbox"/> |                       |                          | $B_4$ | <input type="checkbox"/>         |          |       |
|                  |                          |                       |                          | A     | <input type="checkbox"/> 0.626   |          |       |
| $\chi^2 : 1.180$ |                          |                       |                          |       |                                  |          |       |

(in powder state)

**Fig. S23.** Time profiles of luminescence decay and exponential fit spectrum of **3** at 77 K.

#### 4. Computational details

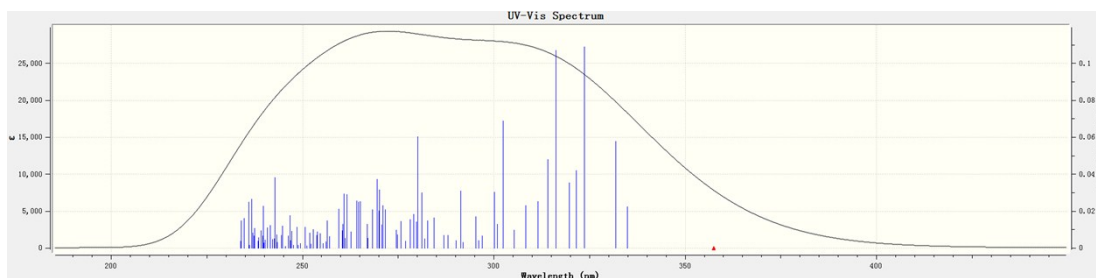

**Fig. S24.** The absorption spectrum of complex **1** in  $\text{CH}_2\text{Cl}_2$ .

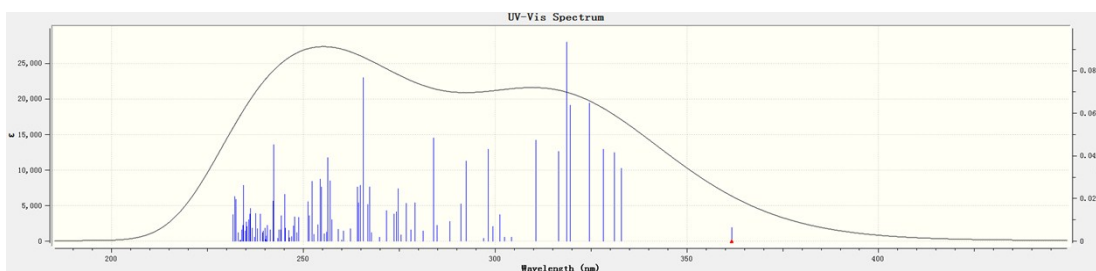

**Fig. S25.** The absorption spectrum of complex **2** in  $\text{CH}_2\text{Cl}_2$ .

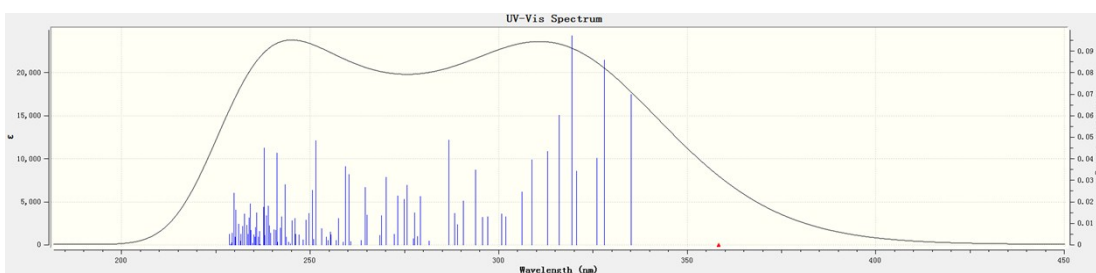

**Fig. S26.** The absorption spectrum of complex **3** in  $\text{CH}_2\text{Cl}_2$ .

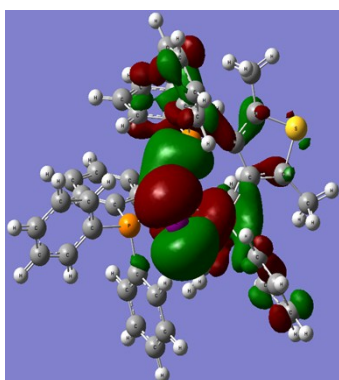

HOMO

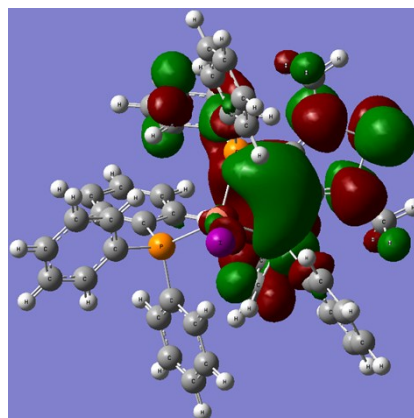

LUMO

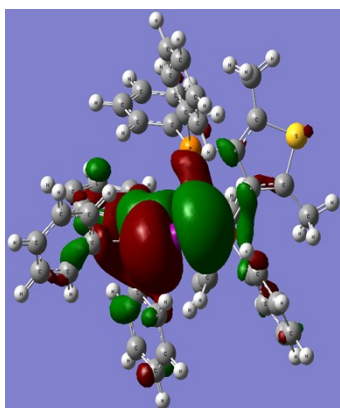

HOMO-1

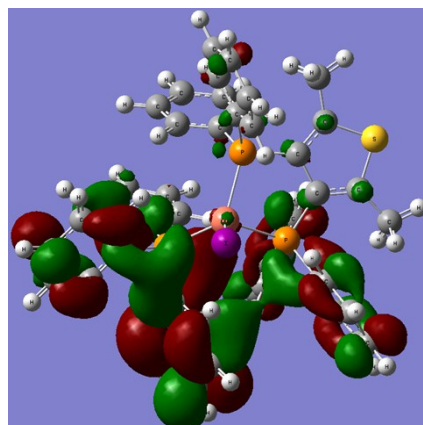

LUMO+1

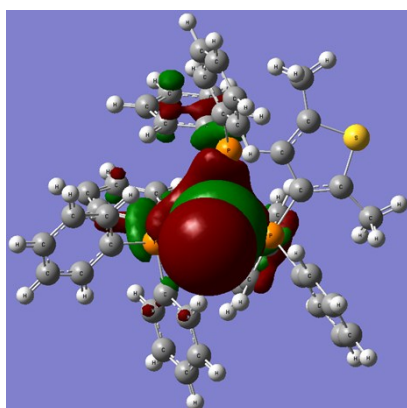

HOMO-2

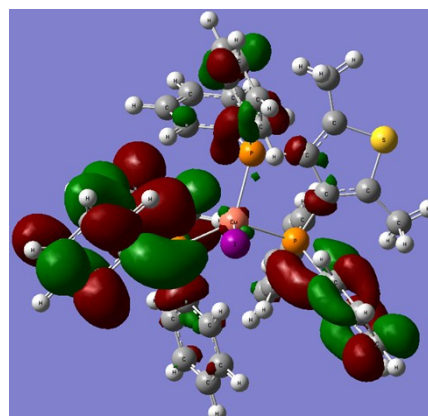

LUMO+2

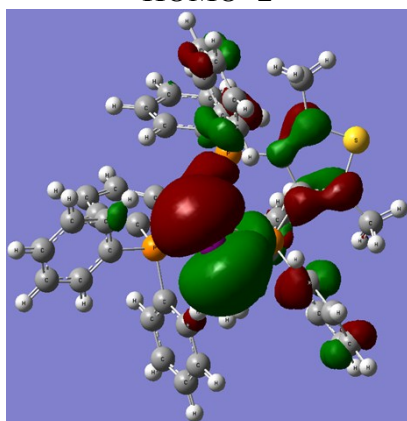

HOMO-3

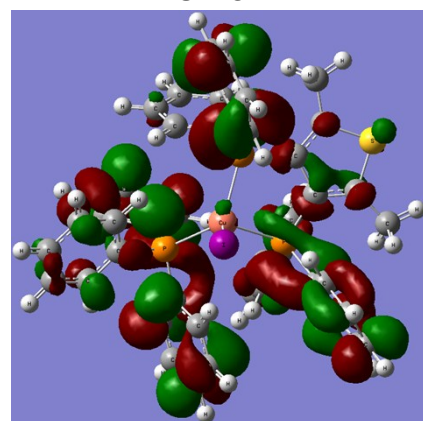

LUMO+3

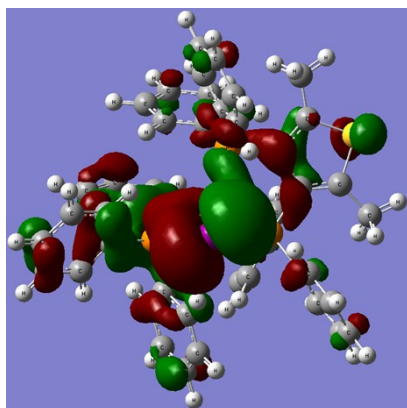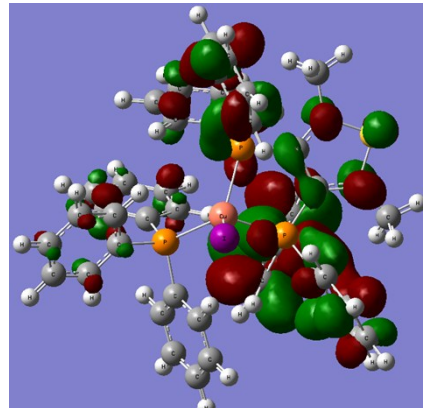

HOMO-4

1

LUMO+4

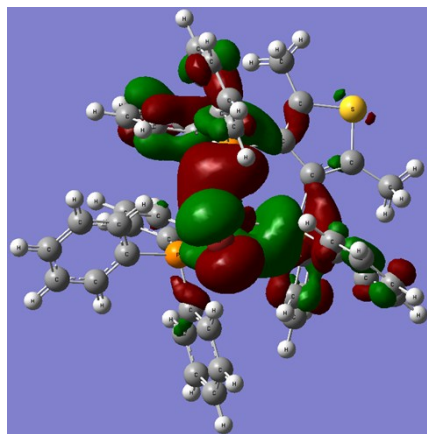

HOMO

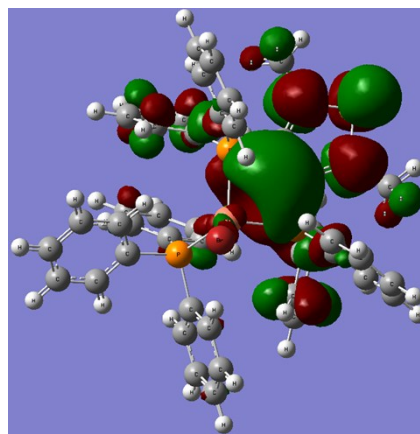

LUMO

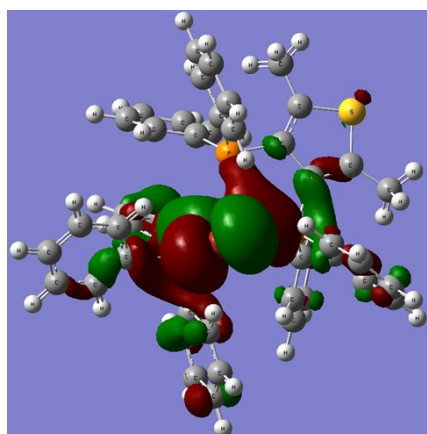

HOMO-1

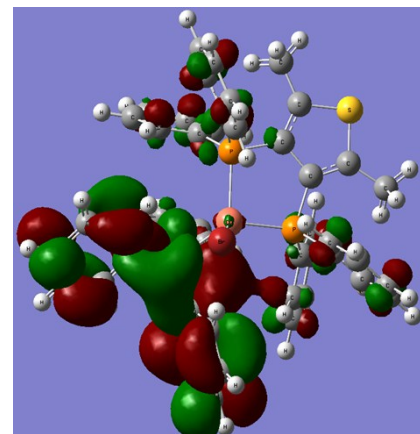

LUMO+1

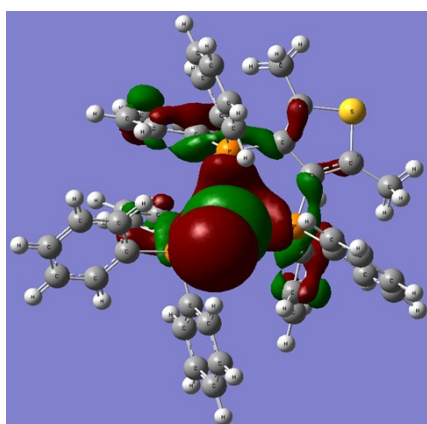

HOMO-2

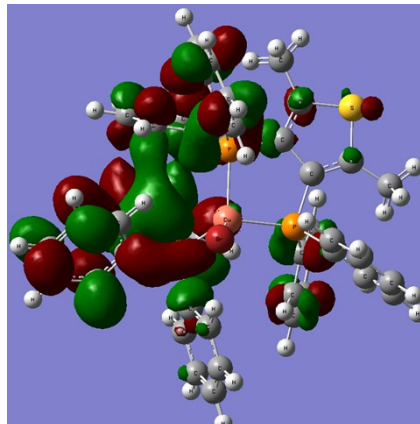

LUMO+2

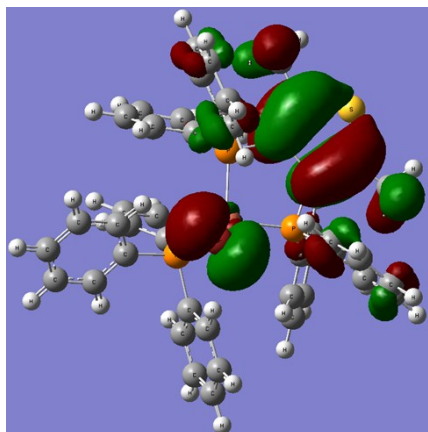

HOMO-3

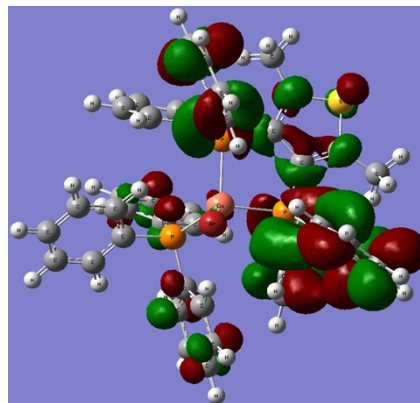

LUMO+3

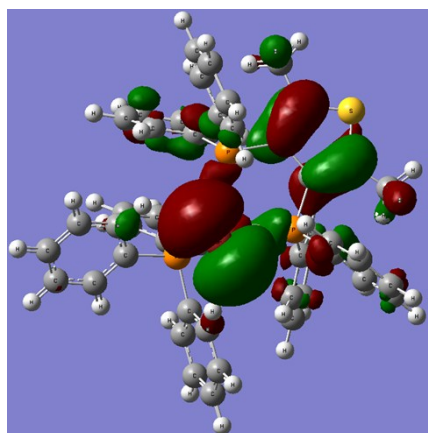

HOMO-4

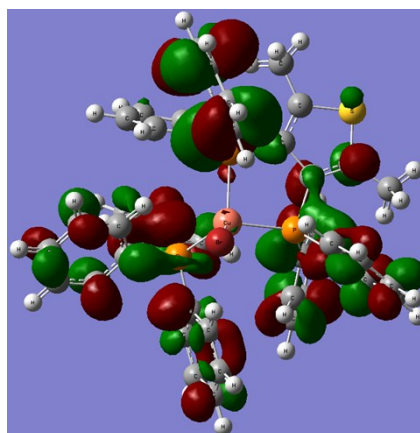

LUMO+4

2

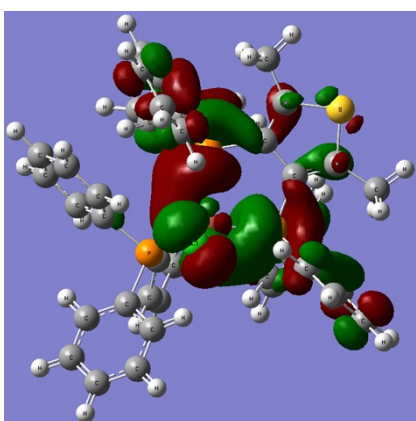

HOMO

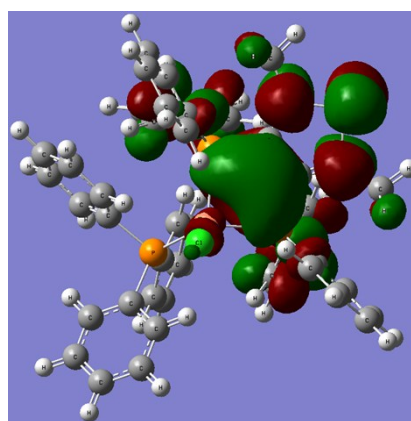

LUMO

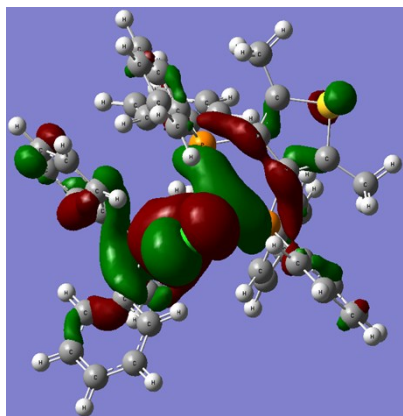

HOMO-1

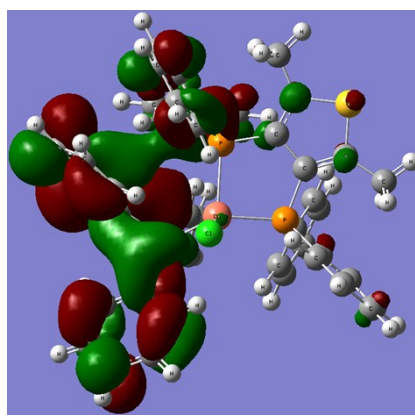

LUMO+1

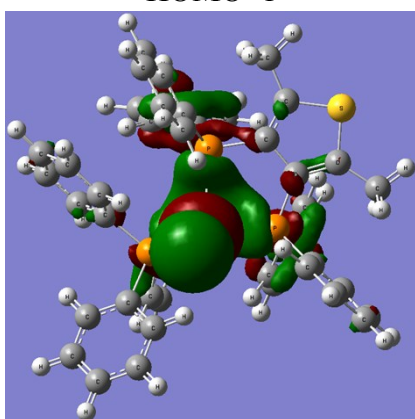

HOMO-2

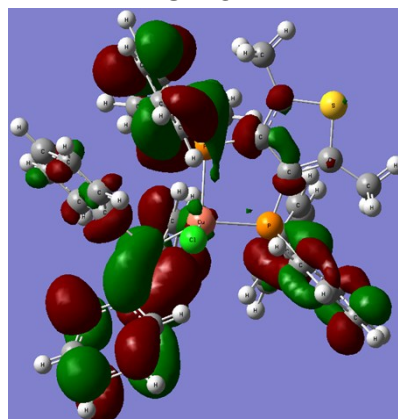

LUMO+2

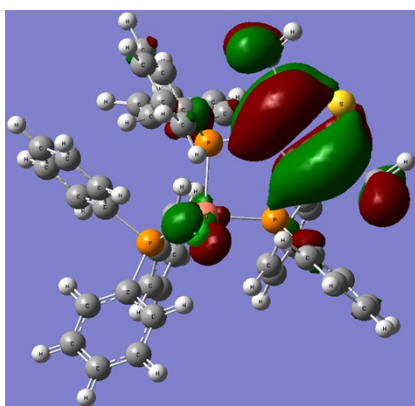

HOMO-3

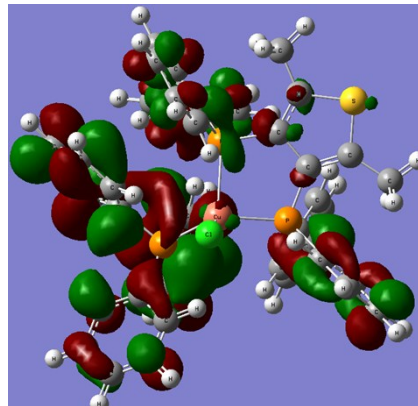

LUMO+3

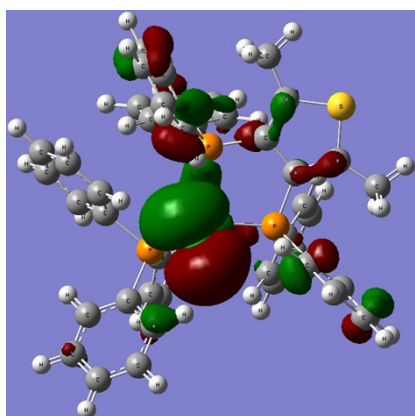

HOMO-4

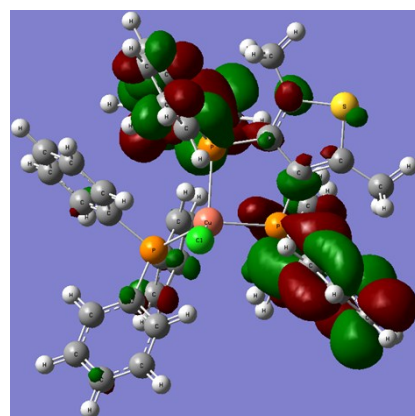

LUMO+4

3

**Fig. S27.** Contour plots of frontier molecular orbitals of complexes **1–3** in  $\text{CH}_2\text{Cl}_2$ .

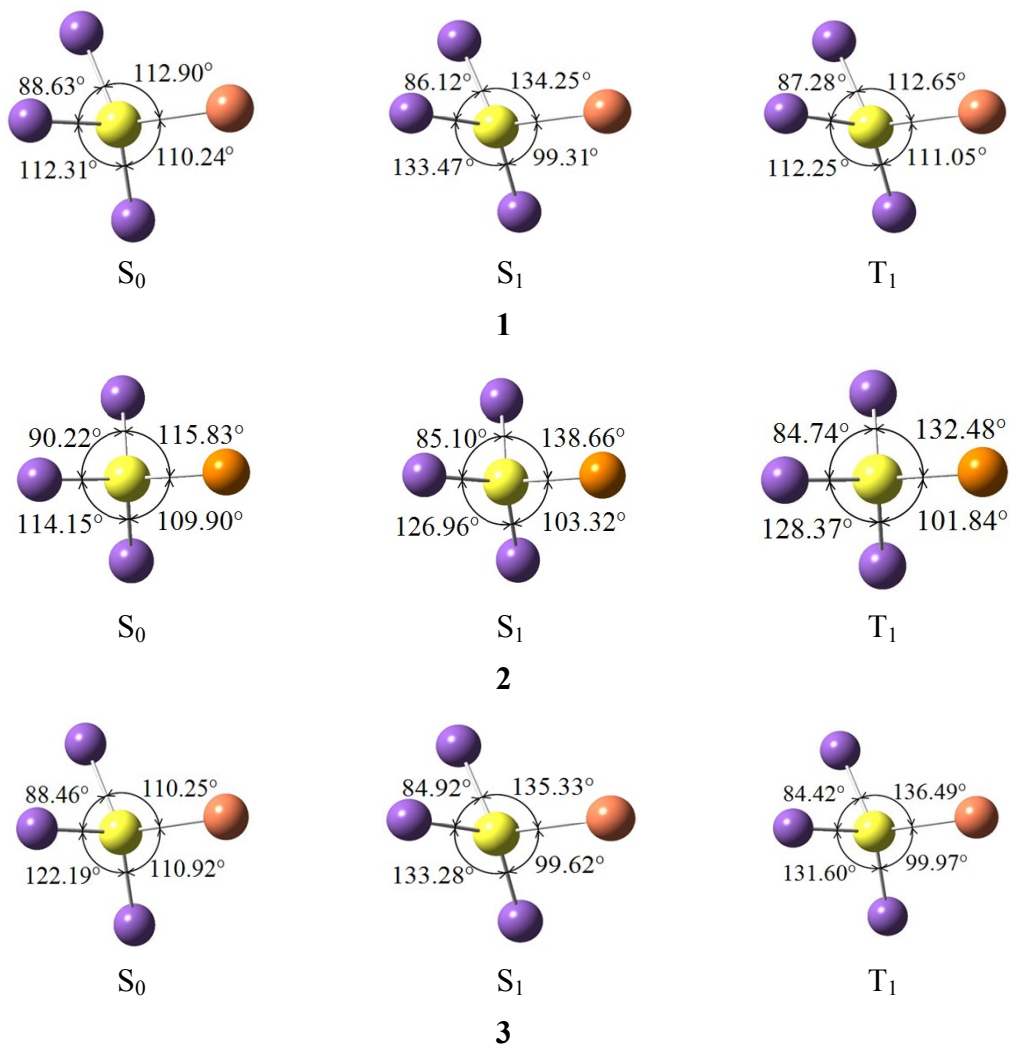

**Fig. S28.** The core structures in the optimized  $S_0$ ,  $S_1$ , and  $T_1$  geometries for complexes **1-3**.

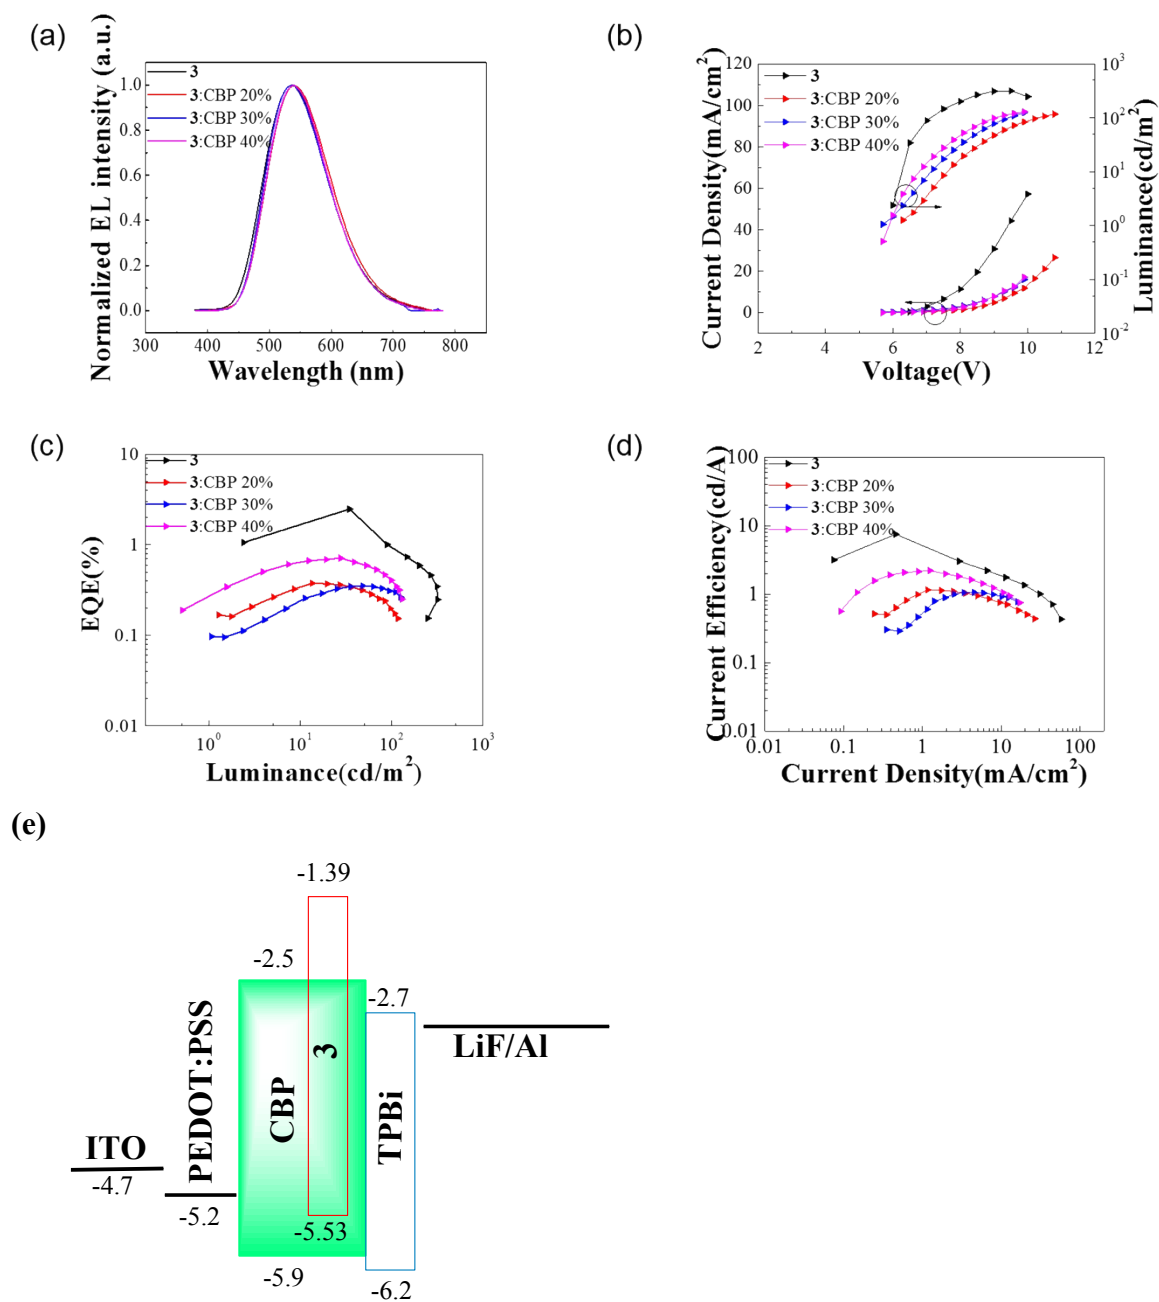

**Fig. S29.** (a) EL spectra; (b) Current density–voltage–luminance (J–V–L) characteristics; (c) EQE–luminance characteristics; (d) Current efficiency- current density characteristics of the undoped device and doped device with dosage concentration of 20%, 30%, 40% when CBP (1,3-bis(9-carbazolyl)benzene) served as host material; (e) Energy-level diagram of the devices based on the complex **3**.



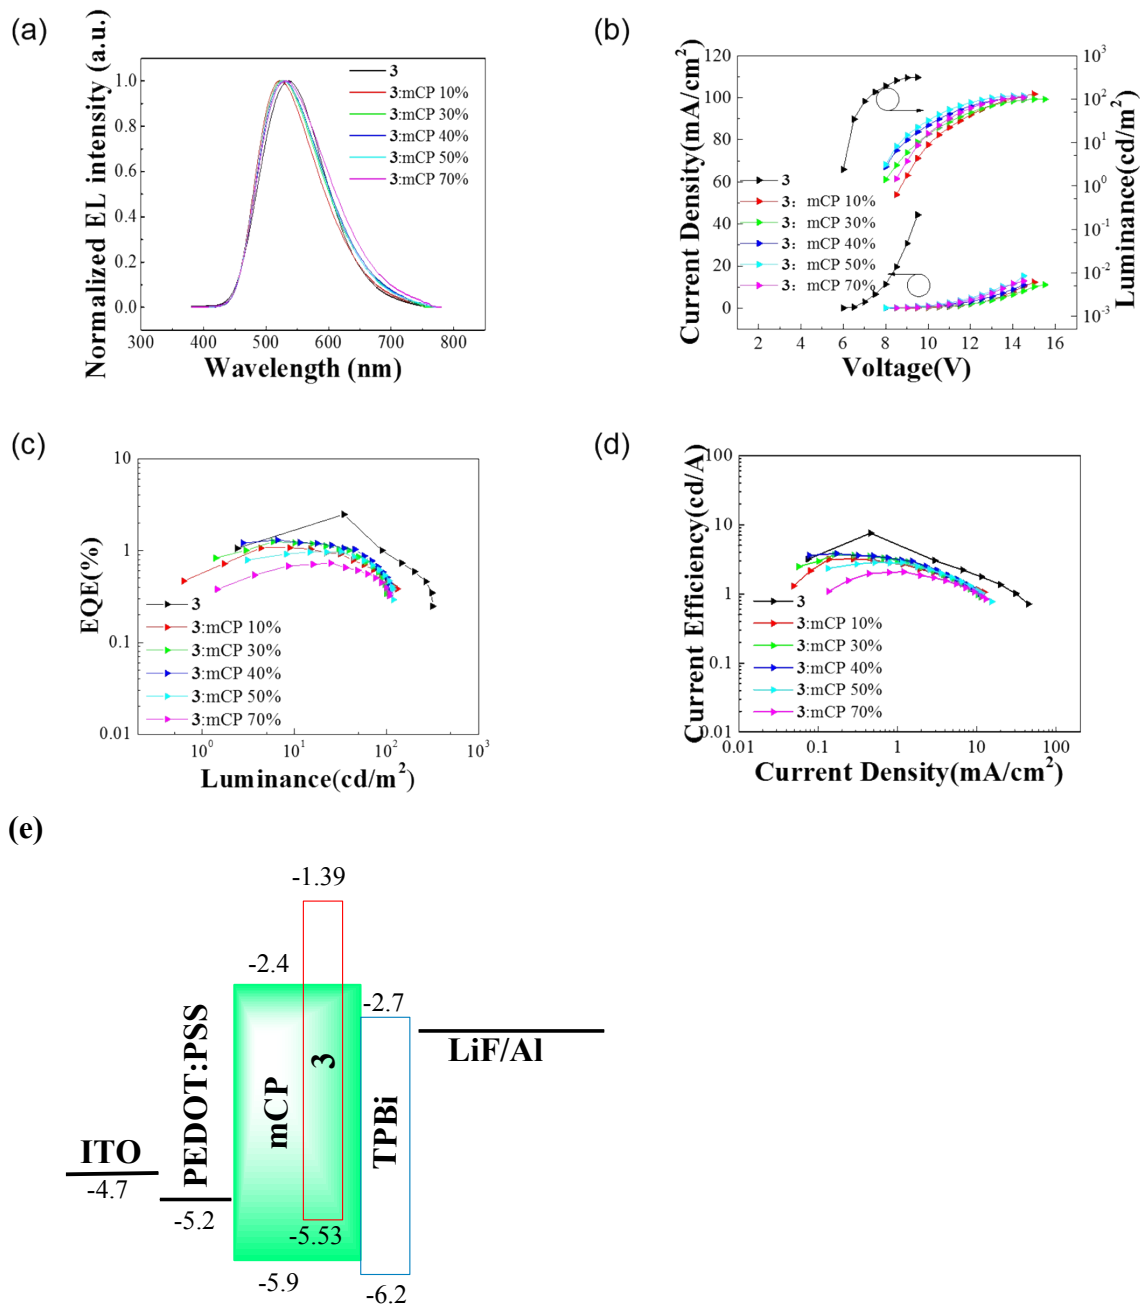

**Fig. S30.** (a) EL spectra (b) Current density–voltage–luminance (J–V–L) characteristics; (c) EQE–luminance characteristics; (d) Current efficiency–current density characteristics of the undoped device and doped device with dosage concentration of 10%, 30%, 40%, 50%, 70% when mCP (4,4′-Bis(9H-carbazol-9-yl)biphenyl) served as host material; (e) Energy-level diagram of the devices based on the complex 3.

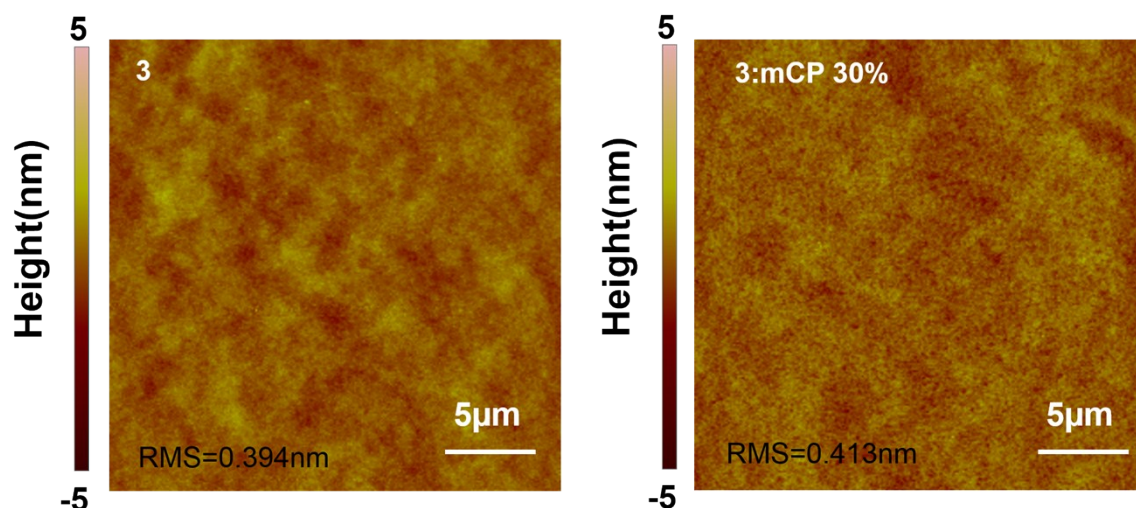

**Fig. S31.** Atomic force microscopy (AFM) images of the undoped film of complex **2** and the doped film with dosage concentration of 30% when mCP served as host material based on the structure of ITO/PEDOT:PSS/EML.

The doped EML film was prepared by mixing the host material solution (dissolved in chlorobenzene, 15 mg/mL) and complex **3** (dissolved in chlorobenzene, 15 mg/mL) at different volume ratios. The mixture was spin coated onto the substrates at 3000 r.p.m for 50 s and baked at 70 °C for 10 min in the glove box. Except for the EML layer, the rest was the same as that for the undoped device.

**Table S1.** Selected bond lengths (Å) and angles (°) in the optimized  $S_0$ ,  $S_1$ , and  $T_1$  geometries for complexes **1-3**

| Complex  | Geometry | Cu-X   | Cu-P                      | P-Cu-P                   | P-Cu-X                    |
|----------|----------|--------|---------------------------|--------------------------|---------------------------|
| <b>1</b> | $S_0$    | 2.6261 | 2.3754, 2.3280,<br>2.3054 | 88.63, 112.31,<br>119.45 | 111.62, 112.90,<br>110.24 |
|          | $S_1$    | 2.6246 | 2.3212, 2.3557,<br>2.3464 | 86.12, 133.47,<br>108.92 | 99.99, 134.25,<br>99.31   |
|          | $T_1$    | 2.6234 | 2.3808, 2.3265,<br>2.3034 | 87.28, 112.25,<br>120.40 | 110.94, 112.65,<br>111.05 |
| <b>2</b> | $S_0$    | 2.4429 | 2.3460, 2.3334,<br>2.3169 | 90.22, 114.15,<br>112.47 | 113.20, 115.83,<br>109.90 |
|          | $S_1$    | 2.4084 | 2.3184, 2.3326,           | 85.10, 126.96,           | 100.28, 138.66,           |

|          |                |        |                   |                |                 |
|----------|----------------|--------|-------------------|----------------|-----------------|
|          |                |        | 2.3701            | 105.67         | 103.32          |
|          | T <sub>1</sub> | 2.4134 | 2.31319, 2.33258, | 84.74, 128.37, | 103.95, 132.48, |
|          |                |        | 2.36879           | 108.65         | 101.84          |
| <b>3</b> | S <sub>0</sub> | 2.3249 | 2.29623, 2.31557, | 88.46, 122.19, | 111.78, 110.25, |
|          |                |        | 2.38149           | 110.90         | 110.92          |
|          | S <sub>1</sub> | 2.2783 | 2.37675, 2.32155, | 84.92, 133.28, | 101.88, 135.33, |
|          |                |        | 2.36089           | 107.30         | 99.62           |
|          | T <sub>1</sub> | 2.2798 | 2.38263, 2.31687, | 84.42, 131.60, | 103.32, 136.49, |
|          |                |        | 2.34531           | 106.28         | 99.97           |

**Table S2.** Energy and compositions of frontiers molecular orbitals of complex **1** in CH<sub>2</sub>Cl<sub>2</sub>.

| MO  | Energy(ev) | Cu   | I    | Thienyl ring | P in dpmt | Phenyl rings in dpmt | P in PPh <sub>3</sub> | Phenyl rings in PPh <sub>3</sub> |
|-----|------------|------|------|--------------|-----------|----------------------|-----------------------|----------------------------------|
| H-4 | -6.39      | 0.04 | 0.02 | 0.11         | 0.13      | 0.20                 | 0.10                  | 0.40                             |
| H-3 | -6.20      | 0.02 | 0.01 | 0.07         | 0.11      | 0.61                 | 0.01                  | 0.17                             |
| H-2 | -6.08      | 0.23 | 0.01 | 0.02         | 0.12      | 0.21                 | 0.12                  | 0.30                             |
| H-1 | -5.69      | 0.13 | 0.02 | 0.06         | 0.08      | 0.09                 | 0.30                  | 0.32                             |
| H   | -5.54      | 0.02 | 0.01 | 0.09         | 0.26      | 0.45                 | 0.01                  | 0.16                             |
| L   | -1.38      | 0.02 | 0.00 | 0.08         | 0.13      | 0.39                 | 0.09                  | 0.29                             |
| L+1 | -1.21      | 0.02 | 0.00 | 0.04         | 0.13      | 0.32                 | 0.08                  | 0.40                             |
| L+2 | -1.11      | 0.01 | 0.00 | 0.05         | 0.03      | 0.30                 | 0.08                  | 0.53                             |
| L+3 | -1.08      | 0.01 | 0.00 | 0.15         | 0.16      | 0.25                 | 0.08                  | 0.34                             |
| L+4 | -1.02      | 0.02 | 0.00 | 0.06         | 0.05      | 0.79                 | 0.02                  | 0.05                             |

**Table S3.** Energy and compositions of frontiers molecular orbitals of complex **2** in CH<sub>2</sub>Cl<sub>2</sub>.

| MO  | Energy(ev) | Cu   | Br   | Thienyl ring | P in dpmt | Phenyl rings in dpmt | P in PPh <sub>3</sub> | Phenyl rings in PPh <sub>3</sub> |
|-----|------------|------|------|--------------|-----------|----------------------|-----------------------|----------------------------------|
| H-4 | -6.59      | 0.01 | 0.02 | 0.10         | 0.38      | 0.35                 | 0.01                  | 0.13                             |
| H-3 | -6.44      | 0.02 | 0.01 | 0.27         | 0.05      | 0.33                 | 0.08                  | 0.24                             |
| H-2 | -6.26      | 0.11 | 0.01 | 0.05         | 0.10      | 0.33                 | 0.08                  | 0.31                             |
| H-1 | -5.77      | 0.06 | 0.01 | 0.06         | 0.10      | 0.16                 | 0.18                  | 0.43                             |
| H   | -5.53      | 0.02 | 0.00 | 0.07         | 0.26      | 0.34                 | 0.03                  | 0.27                             |
| L   | -1.39      | 0.02 | 0.00 | 0.08         | 0.07      | 0.60                 | 0.11                  | 0.12                             |
| L+1 | -1.19      | 0.02 | 0.00 | 0.07         | 0.12      | 0.33                 | 0.09                  | 0.37                             |

|     |       |      |      |      |      |      |      |      |
|-----|-------|------|------|------|------|------|------|------|
| L+2 | -1.15 | 0.01 | 0.00 | 0.10 | 0.09 | 0.31 | 0.07 | 0.43 |
| L+3 | -1.09 | 0.02 | 0.00 | 0.19 | 0.10 | 0.46 | 0.09 | 0.14 |
| L+4 | -1.03 | 0.01 | 0.00 | 0.18 | 0.03 | 0.59 | 0.05 | 0.15 |

**Table S4.** Energy and compositions of frontiers molecular orbitals of complex **3** in CH<sub>2</sub>Cl<sub>2</sub>.

| MO  | Energy(ev) | Cu   | Cl   | Thienyl ring | P in dpmt | Phenyl rings in dpmt | P in PPh <sub>3</sub> | Phenyl rings in PPh <sub>3</sub> |
|-----|------------|------|------|--------------|-----------|----------------------|-----------------------|----------------------------------|
| H-4 | -6.84      | 0.02 | 0.02 | 0.08         | 0.14      | 0.54                 | 0.01                  | 0.20                             |
| H-3 | -6.48      | 0.01 | 0.00 | 0.16         | 0.21      | 0.43                 | 0.03                  | 0.18                             |
| H-2 | -6.31      | 0.07 | 0.01 | 0.04         | 0.16      | 0.49                 | 0.03                  | 0.19                             |
| H-1 | -5.81      | 0.04 | 0.01 | 0.16         | 0.12      | 0.19                 | 0.17                  | 0.31                             |
| H   | -5.53      | 0.02 | 0.00 | 0.08         | 0.23      | 0.52                 | 0.01                  | 0.14                             |
| L   | -1.35      | 0.01 | 0.00 | 0.11         | 0.07      | 0.61                 | 0.03                  | 0.17                             |
| L+1 | -1.22      | 0.01 | 0.00 | 0.05         | 0.13      | 0.26                 | 0.09                  | 0.46                             |
| L+2 | -1.14      | 0.01 | 0.00 | 0.11         | 0.09      | 0.31                 | 0.07                  | 0.41                             |
| L+3 | -1.07      | 0.01 | 0.00 | 0.13         | 0.08      | 0.22                 | 0.08                  | 0.49                             |
| L+4 | -1.03      | 0.05 | 0.00 | 0.12         | 0.04      | 0.69                 | 0.01                  | 0.09                             |

**Table S5.** Computed excitation states for complex **1** in CH<sub>2</sub>Cl<sub>2</sub>.

| State | $\lambda(\text{nm})/E(\text{eV})$ | Configurations                                  | $f$    |
|-------|-----------------------------------|-------------------------------------------------|--------|
| 1     | 357.4 (3.47)                      | H→L(98)                                         | 0.0002 |
| 3     | 331.9 (3.74)                      | H→L+1 (91); H→L+2 (4) ; H→L+3 (2)               | 0.0579 |
| 4     | 323.7 (3.83)                      | H-1→L+1 (2); H→L+1 (6); H→L+2 (63) ; H→L+3 (25) | 0.1089 |
| 7     | 316.2 (3.92)                      | H-1→L+3 (2); H→L+4 (89)                         | 0.1071 |
| 12    | 302.4 (4.10)                      | H-2→L (73); H-1→L+3 (2); H-1→L+4 (18)           | 0.0689 |
| 27    | 280.1 (4.43)                      | H-4→L (82); H-1→L+9 (3); H→L+11 (4)             | 0.0604 |

**Table S6.** Computed excitation states for complex **2** in CH<sub>2</sub>Cl<sub>2</sub>.

| State | $\lambda(\text{nm})/E(\text{eV})$ | Configurations                                       | $f$    |
|-------|-----------------------------------|------------------------------------------------------|--------|
| 1     | 361.8 (3.43)                      | H→L (97)                                             | 0.0064 |
| 5     | 324.5 (3.82)                      | H→L+1 (4); H→L+2 (11); H→L+3 (82)                    | 0.0647 |
| 6     | 319.5 (3.88)                      | H-1→L+1 (3); H→L+4 (69); H→L+5 (23)                  | 0.0637 |
| 7     | 318.7 (3.89)                      | H-1→L+1 (2); H→L+4 (19); H→L+5 (74)                  | 0.0933 |
| 34    | 265.6 (4.67)                      | H-5→L (12); H-2→L+3 (5); H-2→L+5 (52); H-1→L+11 (19) | 0.0768 |

**Table S7.** Computed excitation states for complex **3** in CH<sub>2</sub>Cl<sub>2</sub>.

| State | $\lambda(\text{nm})/E(\text{eV})$ | Configurations                                   | $f$    |
|-------|-----------------------------------|--------------------------------------------------|--------|
| 1     | 358.4 (3.46)                      | H→L(98)                                          | 0.0007 |
| 2     | 335.1 (3.70)                      | H→L+1 (84); H→L+2 (14)                           | 0.0698 |
| 3     | 328.0 (3.78)                      | H→L+1 (14); H→L+2 (76); H→L+3 (5)                | 0.0858 |
| 6     | 319.4 (3.88)                      | H-1→L+1 (4); H→L+2 (3); H→L+3 (11) ; H→L+4 (78)  | 0.0972 |
| 7     | 316.0 (3.92)                      | H-1→L (2); H-1→L+1 (83); H-1→L+2 (9) ; H→L+4 (3) | 0.0601 |
